# Supplementary material for: Integrating Laboratory Experiments and Biogeographic Modelling Approaches to Understand Sensitivity to Ocean Warming in Rare and Common Marine Annelids
Source: Research Square preprint supplement (doi:10.21203/rs.3.rs-242007/v1), 2022-01-12
Supplement: Supplementary file 2 [file bd9aa739cd23a4e33d5846e8.docx]

**Electronic Supplemental Material 2_Tables**

**Integrating laboratory experiments and biogeographic modelling approaches to understand sensitivity to ocean warming in rare and common marine annelids**

Massamba-N’Siala G., Reygondeau G., Simonini R., Cheung W.W.L., Prevedelli D., Calosi P.

Journal: *Oecologia*

**Table S1.** Information on the presence\absence and maximum local abundance (Local abund.) of the species of the genus *Ophryotrocha* considered in our study over 90 localities sampled between 1970 and 2020 in the Northern Hemisphere. The reference literature (Ref.) is reported at the foot of the table. p.o. = personal observation; n.a. = information not available

|  |  | **Species** | ***O. labronica*** |  |  | ***O. japonica*** |  |  | ***O. adherens*** |  |  | ***O. puerilis*** |  |  | ***O. hartmanni*** |  |  | ***O. diadema*** |  |  | ***O. robusta*** |  |  |
| --- | --- | --- | --- | --- | --- | --- | --- | --- | --- | --- | --- | --- | --- | --- | --- | --- | --- | --- | --- | --- | --- | --- | --- |
| **#** | **Country** | **Locality** | **Presence (1) Absence (0)** | **Local abund.** | **Ref.** | **Presence (1) Absence (0)** | **Local abund.** | **Ref.** | **Presence (1) Absence (0)** | **Local abund.** | **Ref.** | **Presence (1) Absence (0)** | **Local abund.** | **Ref.** | **Presence (1) Absence (0)** | **Local abund.** | **Ref.** | **Presence (1) Absence (0)** | **Local abund.** | **Ref.** | **Presence (1) Absence (0)** | **Local abund.** | **Ref.** |
| 1 | UK | Shetland (North Sandwick, Yell) | 0 |  |  | 0 |  |  | 0 |  |  | 0 |  |  | 1 | 282 | L | 0 |  |  | 0 |  |  |
| 2 | UK | Orkney (Puldrite Bay, Wide Firth) | 0 |  |  | 0 |  |  | 0 |  |  | 0 |  |  | 1 | 282 | L | 0 |  |  | 0 |  |  |
| 3 | UK | South Uist (North Bay, Loch Sheilavaig) | 0 |  |  | 0 |  |  | 0 |  |  | 0 |  |  | 1 | 282 | L | 0 |  |  | 0 |  |  |
| 4 | UK | Loch Creran | 0 |  |  | 0 |  |  | 0 |  |  | 0 |  |  | 1 | n.a. | K | 0 |  |  | 0 |  |  |
| 5 | Germany | Heligoland Bight | 0 |  |  | 0 |  |  | 0 |  |  | 0 |  |  | 1 | n.a. | V | 0 |  |  | 0 |  |  |
| 6 | France | Calais | 0 |  |  | 0 |  |  | 0 |  |  | 1 | n.a. | O | 0 |  |  | 0 |  |  | 0 |  |  |
| 7 | France | Wimereux | 0 |  |  | 0 |  |  | 0 |  |  | 1 | n.a. | P | 0 |  |  | 0 |  |  | 0 |  |  |
| 8 | UK | Plymouth | 1 | 1 | p.o. | 0 |  |  | 0 |  |  | 1 | 11 | P,p.o. | 0 |  |  | 0 |  |  | 0 |  |  |
| 9 | France | Baie de la Seine | 0 |  |  | 0 |  |  | 0 |  |  | 1 | n.a. | P | 0 |  |  | 0 |  |  | 0 |  |  |
| 10 | France | Golfe Normano-Breton | 0 |  |  | 0 |  |  | 0 |  |  | 1 | n.a. | P | 0 |  |  | 0 |  |  | 0 |  |  |
| 11 | France | Roscoff | 0 |  |  | 0 |  |  | 0 |  |  | 1 | n.a. | N | 1 | n.a. | N | 0 |  |  | 0 |  |  |
| 12 | Italy | Monfalcone | 0 |  |  | 1 | n.a. | p.o. | 0 |  |  | 0 |  |  | 0 |  |  | 0 |  |  | 0 |  |  |
| 13 | Italy | Lignano Sabbiadoro | 1 | n.a. | p.o. | 1 | n.a. | p.o. | 0 |  |  | 0 |  |  | 0 |  |  | 0 |  |  | 0 |  |  |
| 14 | Italy | Grado | 1 | 36 | D | 1 | n.a. | D | 0 |  |  | 0 |  |  | 0 |  |  | 0 |  |  | 0 |  |  |
| 15 | Italy | Trieste | 1 | n.a. | D | 1 | n.a. | D | 0 |  |  | 0 |  |  | 0 |  |  | 0 |  |  | 0 |  |  |
| 16 | Italy | Muggia | 1 | n.a. | p.o. | 1 | n.a. | p.o. | 0 |  |  | 0 |  |  | 0 |  |  | 0 |  |  | 0 |  |  |
| 17 | Italy | Venezia | 1 | 50 | C,D | 1 | 43 | D | 0 |  |  | 0 |  |  | 0 |  |  | 0 |  |  | 0 |  |  |
| 18 | Italy | Chioggia | 1 | 27 | C,D | 1 | n.a. | C,D | 0 |  |  | 0 |  |  | 0 |  |  | 0 |  |  | 0 |  |  |
| 19 | Italy | Ravenna | 1 | 127 | C,D | 1 | 374 | D,E | 0 |  |  | 0 |  |  | 0 |  |  | 0 |  |  | 0 |  |  |
| 20 | Italy | Genova | 1 | 62 | C,D | 1 | 12 | D | 0 |  |  | 1 | n.a. | D | 0 |  |  | 0 |  |  | 0 |  |  |
| 21 | Italy | Lavagna | 1 | n.a. | D | 0 |  |  | 0 |  |  | 1 | n.a. | D | 0 |  |  | 0 |  |  | 0 |  |  |
| 22 | Italy | Cervia | 1 | n.a. | C,D | 0 |  |  | 0 |  |  | 0 |  |  | 0 |  |  | 0 |  |  | 0 |  |  |
| 23 | Italy | Cesenatico | 0 |  |  | 0 |  |  | 0 |  |  | 0 |  |  | 0 |  |  | 0 |  |  | 0 |  |  |
| 24 | Italy | La Spezia | 1 | 1107 | C,D | 1 | 407 | D | 1 | 40 | p.o. | 1 | 205 | D | 1 | 1 | I | 0 |  |  | 0 |  |  |
| 25 | Italy | Rimini | 1 | 100 | D | 1 | n.a. | D | 0 |  |  | 0 |  |  | 0 |  |  | 0 |  |  | 0 |  |  |
| 26 | Italy | Porto Venere | 1 | 2 | D | 1 | 16 | D | 0 |  |  | 1 | 11 | D | 0 |  |  | 0 |  |  | 0 |  |  |
| 27 | Italy | Marina di Carrara | 1 | 625 | C,D | 0 |  |  | 0 |  |  | 1 | 6 | D | 0 |  |  | 0 |  |  | 0 |  |  |
| 28 | Italy | Pesaro | 0 |  |  | 1 | n.a. | D | 0 |  |  | 0 |  |  | 0 |  |  | 0 |  |  | 0 |  |  |
| 29 | Italy | Viareggio | 1 | 132 | D | 0 |  |  | 0 |  |  | 0 |  |  | 0 |  |  | 0 |  |  | 0 |  |  |
| 30 | Italy | Ancona | 1 | 1 | D | 1 | 15 | D | 0 |  |  | 1 | 2 | D | 1 | 1 | D | 0 |  |  | 0 |  |  |
| 31 | Italy | Livorno | 1 | 60 | A,B,C,D,p.o. | 1 | 223 | D,E, PO | 0 |  |  | 1 | 7 | B,p.o. | 0 |  |  | 0 |  |  | 0 |  |  |
| 32 | Italy | Castiglioncello | 1 | 15 | D | 0 |  |  | 0 |  |  | 0 |  |  | 0 |  |  | 0 |  |  | 0 |  |  |
| 33 | Spain | San Sebastián (Isla de Santa Clara), Gipuzkoa | 1 | n.a. | S | 0 |  |  | 0 |  |  | 0 |  |  | 0 |  |  | 0 |  |  | 0 |  |  |
| 34 | Italy | Civitanova Marche | 1 | n.a. | p.o. | 0 |  |  | 0 |  |  | 0 |  |  | 0 |  |  | 0 |  |  | 0 |  |  |
| 35 | Italy | Cecina | 0 |  |  | 0 |  |  | 0 |  |  | 0 |  |  | 0 |  |  | 0 |  |  | 0 |  |  |
| 36 | Italy | Piombino | 1 | 40 | C,D, p.o. | 1 | n.a. | D,p.o. | 0 |  |  | 1 | 12 | B | 1 | 7 | D,PO | 0 |  |  | 0 |  |  |
| 37 | Italy | Castiglione della Pescaia | 1 | 6 | D | 0 |  |  | 0 |  |  | 0 |  |  | 0 |  |  | 0 |  |  | 0 |  |  |
| 38 | Italy | Orbetello | 1 | 45 | C,D | 1 | 4 | D | 0 |  |  | 0 |  |  | 0 |  |  | 0 |  |  | 0 |  |  |
| 39 | Italy | Ortona | 0 |  |  | 1 | 8 | D | 0 |  |  | 0 |  |  | 0 |  |  | 0 |  |  | 0 |  |  |
| 40 | Italy | Civitavecchia | 1 | 20 | p.o. | 1 | 50 | D | 0 |  |  | 0 |  |  | 0 |  |  | 0 |  |  | 0 |  |  |
| 41 | Italy | Termoli | 1 | n.a. | D | 0 |  |  | 0 |  |  | 0 |  |  | 0 |  |  | 0 |  |  | 0 |  |  |
| 42 | Spain | Blanes | 1 | 3 | M,Q | 0 |  |  | 0 |  |  | 1 | 29 | M,Q | 0 |  |  | 0 |  |  | 0 |  |  |
| 43 | Spain | Barcelona | 0 |  |  | 0 |  |  | 0 |  |  | 0 |  |  | 1 | n.a. | T | 0 |  |  | 0 |  |  |
| 44 | Italy | Olbia | 1 | 31 | C,D | 0 |  |  | 0 |  |  | 1 | 35 | D | 0 |  |  | 0 |  |  | 0 |  |  |
| 45 | Italy | Porto Torres | 1 | n.a. | D | 0 |  |  | 0 |  |  | 1 | 5 | D | 0 |  |  | 0 |  |  | 0 |  |  |
| 46 | Italy | Napoli | 1 | n.a. | A,B,C,D | 0 |  |  | 0 |  |  | 1 | n.a. | D | 0 |  |  | 0 |  |  | 0 |  |  |
| 47 | Italy | Brindisi | 0 |  |  | 1 | 26 | D | 0 |  |  | 0 |  |  | 0 |  |  | 0 |  |  | 0 |  |  |
| 48 | Italy | Alghero | 0 |  |  | 0 |  |  | 0 |  |  | 1 | 5 | D | 0 |  |  | 0 |  |  | 0 |  |  |
| 49 | Italy | Taranto | 1 |  | p.o. | 1 | n.a. | D | 0 |  |  | 0 |  |  | 0 |  |  | 0 |  |  | 0 |  |  |
| 50 | Italy | Gallipoli | 0 |  |  | 0 |  |  | 0 |  |  | 0 |  |  | 0 |  |  | 0 |  |  | 0 |  |  |
| 51 | Spain | Palma de Mallorca | 1 |  | R | 0 |  |  | 0 |  |  | 1 | n.a. | R | 0 |  |  | 0 |  |  | 1 | n.a. | R |
| 52 | Italy | Santa Giusta (Oristano) | 1 | 4 | C,D | 0 |  |  | 0 |  |  | 0 |  |  | 0 |  |  | 0 |  |  | 0 |  |  |
| 53 | Greece | Almyros | 1 |  | B | 0 |  |  | 0 |  |  | 0 |  |  | 0 |  |  | 0 |  |  | 0 |  |  |
| 54 | Italy | Crotone | 1 | 12 | D | 1 | 7 | D | 0 |  |  | 1 | 8 | D | 0 |  |  | 0 |  |  | 0 |  |  |
| 55 | Turkey | Izmir Bay | 1 | n.a. | p.o. | 0 |  |  | 0 |  |  | 0 |  |  | 0 |  |  | 0 |  |  | 0 |  |  |
| 56 | Spain | Alicante | 1 | n.a. | p.o. | 0 |  |  | 0 |  |  | 0 |  |  | 0 |  |  | 0 |  |  | 0 |  |  |
| 57 | Italy | Messina | 0 |  |  | 0 |  |  | 0 |  |  | 0 |  |  | 0 |  |  | 0 |  |  | 0 |  |  |
| 58 | Italy | Palermo | 0 |  |  | 0 |  |  | 0 |  |  | 1 | n.a. | D | 0 |  |  | 0 |  |  | 0 |  |  |
| 59 | Italy | Castellamare del Golfo | 1 | n.a. | p.o. | 0 |  |  | 0 |  |  | 0 |  |  | 0 |  |  | 0 |  |  | 0 |  |  |
| 60 | Italy | Trapani | 1 | 412 | D | 0 |  |  | 0 |  |  | 0 |  |  | 0 |  |  | 0 |  |  | 0 |  |  |
| 61 | Italy | Termini Imerese | 1 | n.a. | p.o. | 0 |  |  | 0 |  |  | 0 |  |  | 0 |  |  | 0 |  |  | 0 |  |  |
| 62 | Italy | Catania | 1 | 119 | D | 0 |  |  | 0 |  |  | 0 |  |  | 0 |  |  | 0 |  |  | 1 | n.a. | D,I |
| 63 | Italy | Porto Empedocle | 1 | 440 | D | 1 | 12 | D,p.o. | 1 | 150 | D | 1 | 1440 | D,p.o. | 1 | 1 | D | 1 | 68 | D | 1 | 8 | D,I |
| 64 | Italy | Augusta | 1 | 315 | D | 0 |  |  | 0 |  |  | 0 |  |  | 0 |  |  | 0 |  |  | 0 |  |  |
| 65 | Portugal | Lagos | 1 | n.a. | D | 0 |  |  | 0 |  |  | 0 |  |  | 0 |  |  | 0 |  |  | 0 |  |  |
| 66 | Italy | Licata | 1 | 167 | D | 0 |  |  | 0 |  |  | 0 |  |  | 0 |  |  | 0 |  |  | 0 |  |  |
| 67 | Italy | Siracusa | 1 | 142 | D | 0 |  |  | 0 |  |  | 0 |  |  | 0 |  |  | 0 |  |  | 1 | n.a. | D,I |
| 68 | Italy | Gela | 1 | 174 | D | 0 |  |  | 0 |  |  | 0 |  |  | 0 |  |  | 0 |  |  | 0 |  |  |
| 69 | Portugal | Faro | 1 | n.a. | B | 0 |  |  | 0 |  |  | 0 |  |  | 0 |  |  | 0 |  |  | 0 |  |  |
| 70 | Italy | Ognina | 0 |  |  | 0 |  |  | 0 |  |  | 0 |  |  | 0 |  |  | 0 |  |  | 0 |  |  |
| 71 | Italy | Marzamemi | 0 |  |  | 0 |  |  | 0 |  |  | 0 |  |  | 0 |  |  | 0 |  |  | 0 |  |  |
| 72 | Spain | Malaga | 0 |  |  | 0 |  |  | 0 |  |  | 1 | n.a. | B,U | 1 | n.a. | B | 0 |  |  | 1 | n.a. | I |
| 73 | Italy | Porto Palo di Capo Passero | 1 | 164 | D | 0 |  |  | 1 | n.a. | D | 0 |  |  | 0 |  |  | 0 |  |  | 0 |  |  |
| 74 | Greece | Rhodos | 1 | n.a. | B | 0 |  |  | 0 |  |  | 0 |  |  | 0 |  |  | 0 |  |  | 0 |  |  |
| 75 | UK | Gibraltar | 0 |  |  | 0 |  |  | 0 |  |  | 1 | n.a. | H | 0 |  |  | 0 |  |  | 1 | n.a. | I |
| 76 | Spain | Tarifa | 0 |  |  | 0 |  |  | 0 |  |  | 0 |  |  | 0 |  |  | 0 |  |  | 1 | n.a. | I |
| 77 | Spain | Ceuta | 0 |  |  | 0 |  |  | 0 |  |  | 0 |  |  | 0 |  |  | 0 |  |  | 1 | n.a. | I |
| 78 | Greece | Khania | 1 | n.a. | B | 0 |  |  | 0 |  |  | 0 |  |  | 0 |  |  | 0 |  |  | 0 |  |  |
| 79 | Cyprus | Kyrenia | 1 | n.a. | B | 0 |  |  | 1 | n.a. | W | 0 |  |  | 0 |  |  | 0 |  |  | 0 |  |  |
| 80 | Cyprus | Famagusta | 1 | n.a. | B | 0 |  |  | 0 |  |  | 0 |  |  | 0 |  |  | 0 |  |  | 0 |  |  |
| 81 | Japan | Sagami Bay | 1 | n.a. | G | 0 |  |  | 0 |  |  | 0 |  |  | 0 |  |  | 0 |  |  | 0 |  |  |
| 82 | Cyprus | Limassol | 1 | n.a. | B | 0 |  |  | 0 |  |  | 0 |  |  | 0 |  |  | 0 |  |  | 0 |  |  |
| 83 | USA | Long Beach (Los Angeles) | 1 | n.a. | B | 1 | n.a. | D,F | 0 |  |  | 0 |  |  | 0 |  |  | 1 | n.a. | D | 0 |  |  |
| 84 | Japan | Amakusa | 0 |  |  | 1 | n.a. | I | 0 |  |  | 0 |  |  | 0 |  |  | 0 |  |  | 0 |  |  |
| 85 | Giordania | Aqaba | 1 | n.a. | D | 0 |  |  | 0 |  |  | 0 |  |  | 0 |  |  | 0 |  |  | 0 |  |  |
| 86 | Spain | Tenerife | 1 | n.a. | p.o. | 0 |  |  | 0 |  |  | 0 |  |  | 0 |  |  | 0 |  |  | 0 |  |  |
| 87 | Spain | Las Palmas | 0 |  |  | 0 |  |  | 1 | n.a. | W | 0 |  |  | 0 |  |  | 0 |  |  | 0 |  |  |
| 88 | Egypt | Hurghada | 1 | n.a. | U | 0 |  |  | 0 |  |  | 0 |  |  | 0 |  |  | 0 |  |  | 0 |  |  |
| 89 | Hawaii | Mamala Bay, Oahu | 1 | n.a. |  | 0 |  |  | 1 | n.a. | W,X | 0 |  |  | 0 |  |  | 0 |  |  | 0 |  |  |
| 90 | Australia | Sydney | 1 | n.a. | G | 0 |  |  | 0 |  |  | 0 |  |  | 0 |  |  | 0 |  |  | 0 |  |  |
| **References** | |  |  |  |  |  |  |  |  |  |  |  |  |  |  |  |  |  |  |  |  |  |  |
| A | Åkesson, B. (1973). Reproduction and larval morphology of five *Ophryotrocha* species (Polychaeta, Dorvilleidae). Zool. Scr., 2:145-55. | | | | | | | | | | | | | |  |  |  |  |  |  |  |  |  |
| B | Åkesson, B. (1975). Reproduction in the genus *Ophryotrocha* (Polychaeta, Dorvilleidae). Pubbl. Staz. Zool. Napoli, 39: 377-398. | | | | | | | | | | | | |  |  |  |  |  |  |  |  |  |  |
| C | Simonini, R. (2002). Distribution and ecology of the genus Ophryotrocha (Polychaeta: Dorvilleidae) in Italian harbors and lagoons. Vie et Milieu, 52(1): 59-65. | | | | | | | | | | | | | | | |  |  |  |  |  |  |  |
| D | Simonini, R., Massamba-N'Siala, G., Grandi, V., & Prevedelli, D. (2009). Distribution of the genus *Ophryotrocha* (Polychaeta) in Italy: new records and comments on the biogeography of Mediterranean species. | | | | | | | | | | | | | | | | | | | | | |  |
|  | Vie et milieu (1980), 59(1), 79-88. | | |  |  |  |  |  |  |  |  |  |  |  |  |  |  |  |  |  |  |  |  |
| E | Simonini, R., & Prevedelli, D. (2003). Life history and demography of three populations of *Ophryotrocha japonica* (Polychaeta: Dorvilleidae). Mar. Ecol. Pog. Ser., 258: 171-180. | | | | | | | | | | | | | | | | | |  |  |  |  |  |
| F | Dahlgren, T.G., Akesson, B., Schander, C., Halanych, K. M., & Sundberg, P. (2001). Molecular phylogeny of the model annelid Ophryotrocha. Biol. Bull., 201(2): 193-203. | | | | | | | | | | | | | | | | | |  |  |  |  |  |
| G | Åkesson, B., & Paxton, H. (2005). Biogeography and incipient speciation in *Ophryotrocha labronica* (Polychaeta, Dorvilleidae). Mar. Biol. Res., 1(2): 127-39. | | | | | | | | | | | | | | | |  |  |  |  |  |  |  |
| H | Paxton, H., & Åkesson, B. (2007). Redescription of *Ophryotrocha puerilis* and *O. labronica* (Annelida, Dorvilleidae). Mar. Biol. Res., 3(1): 3-19. | | | | | | | | | | | | | | |  |  |  |  |  |  |  |  |
| I | Paxton, H., & Åkesson, B. (2010). The *Ophryotrocha labronica* group (Annelida: Dorvilleidae)— with the description of seven new species. Zootaxa, 2713: 1-24. | | | | | | | | | | | | | | | | |  |  |  |  |  |  |
| J | Paavo, B., Bailey-Brock, J.H., & Åkesson, B. (2000). Morphology and life history of *Ophryotrocha adherens* sp. nov. (Polychaeta,Dorvilleidae). Sarsia, 85(3): 251-264. | | | | | | | | | | | | | | | | |  |  |  |  |  |  |
| K | Pereira, P.M.F., Black, K., McLusky, D.S., & Nickell, T.D. (2003). Recovery of sediments after cessation of marine fish farm production. Aquaculture, 235: 315-330. | | | | | | | | | | | | | | | | |  |  |  |  |  |  |
| L | Hall-Spencer, J., White, N., Gillespie, E., Gillham, K., & Foggo, A. (2006). Impact of fish farms on maerl beds in strongly tidal areas. Mar. Ecol. Prog. Ser., 326: 1-9. | | | | | | | | | | | | | | | | |  |  |  |  |  |  |
| M | Sarda, R. (1997). Soft Bottom Communities of the Bay of Blanes. Centre d’Estudis Avançats de Blanes (CEAB), Consejo Superior de Investigaciones Científica (CSIC), Spain. | | | | | | | | | | | | | | | | | |  |  |  |  |  |
| N | Parenti, U. (1961). *Ophryotrocha puerilis siberti*, *O. hartmanni* and *O. baccii* nelle acque di Roscoff. Cahiers de Biologie Marine, 2: 437-445. | | | | | | | | | | | | | | |  |  |  |  |  |  |  |  |
| O | Muller, Y. (2004). Faune et flore du littoral du Nord, du Pas-de-Calais et de la Belgique: inventaire. [Coastal fauna and flora of the Nord, Pas-de-Calais and Belgium: inventory]. | | | | | | | | | | | | | | | | | |  |  |  |  |  |
|  | Commission Régionale de Biologie Région Nord Pas-de-Calais: France. 307 pp., | | | | | | | |  |  |  |  |  |  |  |  |  |  |  |  |  |  |  |
| P | Dauvin, J.-C., Dewarumez, J.-M., & Gentil, F. (2003). Liste actualisée des espèces d'Annélides Polychètes présentes en Manche [An up to date list of polychaetous annelids from the English Channel]. | | | | | | | | | | | | | | | | | | | | |  |  |
|  | Cahiers de Biologie Marine, 44(1): 67-95. | | | |  |  |  |  |  |  |  |  |  |  |  |  |  |  |  |  |  |  |  |
| Q | Taboada, S., Leiva, C., Bas, M., Schult, N., & McHugh, D. (2017). Cryptic species and colonization processes in Ophryotrocha (Annelida, Dorvilleidae) inhabiting vertebrate remains in the shallow‐water Mediterranean. | | | | | | | | | | | | | | | | | | | | | |  |
|  | Zool. Scripta, 46(5): 611-624. | | |  |  |  |  |  |  |  |  |  |  |  |  |  |  |  |  |  |  |  |  |
| R | Núñez, J., Maggio, Y., & Riera, R. (2013). Dorvilleidos (Polychaeta, Dorvilleidae) recolectados durante el proyecto “Fauna Ibérica” y catálogo de las especies íbero-baleares. Graellsia, 69(2), 275-282. | | | | | | | | | | | | | | | | | | | | |  |  |
| S | Aguirrezabalaga, F., 1984. Contribución al estudio de los Anélidos Poliquetos de la costa de Guipúzcoa. Munibe, San Sebastián, 36: 119-130. | | | | | | | | | | | | | |  |  |  |  |  |  |  |  |  |
| T | Méndez, N. & Cardell, M.J., 1996. Littoral annelid polychaetes inhabiting soft bottoms of the Barcelonès (Catalonia, NE Spain). Miscelània Zoològica, 19(1): 119-147. | | | | | | | | | | | | | | | | |  |  |  |  |  |  |
| U | Wiklund, H., Glober, A. G & Dahlgren, T.G., 2009. Three new species of Ophryotrocha (Annelida: Dorvilleidae) from a whale-fall in the North-East Atlantic. Zootaxa, 2228: 43-56. | | | | | | | | | | | | | | | | | | |  |  |  |  |
| V | Wiklund, H., Altamira, I. V., Glover, A. G., Smith, C. R., Baco, A. R., & Dahlgren, T. G. (2012). Systematics and biodiversity of Ophryotrocha (Annelida, Dorvilleidae) with descriptions of six new species | | | | | | | | | | | | | | | | | | | | |  |  |
|  | from deep-sea whale-fall and wood-fall habitats in the north-east Pacific. Systematics and Biodiversity, 10(2), 243-259. | | | | | | | | | | | |  |  |  |  |  |  |  |  |  |  |  |
| W | Paavo, B., Bailey-Brock, J. H., Åkesson, B., & Nylund, A. (2000). Morphology and life history of Ophryotrocha adherens sp. nov.(Polychaeta, Dorvilleidae). Sarsia, 85(3), 251-264. | | | | | | | | | | | | | | | | | | |  |  |  |  |
| X | Lee, H. W., Bailey-Brock, J. H., & McGurr, M. M. (2006). Temporal changes in the polychaete infaunal community surrounding a Hawaiian mariculture operation. Marine Ecology Progress Series, 307, 175-185. | | | | | | | | | | | | | | | | | | | | | |  |

**Table S2.** Extent of occurrence (EOO) and mean (± SD) maximum local abundance based on the information on the global distribution of the studied species and obtained from 90 localities in the Northern Hemisphere. When a locality was sampled multiple times at different sites, the maximum number of individuals collected was considered as representative of the abundance of that locality. The first and third quartiles of the EOO and local abundance used to determine the common, uncommon, and rare status of the studied species are shown. The total number of localities where a species was recorded and species prevalence (i.e., the presence/absence ratio to the total number of collected sites) are also provided

|  | **Number of localities**  **where the species was recorded** | **Prevalence** | **EOO**  **(Km2)** | **Mean (±SD) abundance**  **(Number of individuals)** |
| --- | --- | --- | --- | --- |
| **Species** |
| *O. labronica* | 61 | 0.68 | 89510878 | 132.89 ±206.55 |
| *O. japonica* | 25 | 0.28 | 57062829 | 91.68 ±111.75 |
| *O. adherens* | 6 | 0.07 | 31461624 | 62.25 ±59.22 |
| *O. puerilis* | 25 | 0.28 | 2048432 | 67.82 ±234.04 |
| *O. hartmanni* | 12 | 0.13 | 2925979 | 58.07 ±115.91 |
| *O. diadema* | 2 | 0.02 | 0 | 68 ±0 |
| *O. robusta* | 8 | 0.09 | 324518.953 | 8 ±0 |
| **Measurements of data position** |  |  |  |  |
| 1 quartile |  | 0.08 | 1186475 | 60.16 |
| 3 quartile |  | 0.28 | 44262226 | 79.84 |

**Table S3.** Results of the Spearman correlation analysis performed between the HSI values calculated for the studied species for the North Atlantic and Mediterranean regions based on observed temperature data and those modelled for the reference period (1970-2000)

| **Species** | **R (Spearman)** |
| --- | --- |
| *Ophryotrocha labronica* | 0.92 |
| *Ophryotrocha japonica* | 0.93 |
| *Ophryotrocha adherens* | 0.92 |
| *Ophryotrocha puerilis* | 0.92 |
| *Ophryotrocha hartmanni* | 0.93 |
| *Ophryotrocha diadema* | 0.93 |
| *Ophryotrocha robusta* | 0.93 |

**Table S4.** Results of the tests for phylogenetic signal by Pagel’s lambda (λ) values for a-e) maximum and minimum critical temperature limits (CTmax and CTmin, respectively), f) survival, and g) total fecundity measured in the studied species. The log-likelihood (LogL) for the reported λ, the log-likelihood of λ = 0, and the *P*-value (*P*) are reported

| **Traits** | **Acclimation**  **temperature** |  | **Pagel's lambda** | |  |  |
| --- | --- | --- | --- | --- | --- | --- |
|  | **(°C)** |  | **λ** | **LogL** | **Log0** | ***P*** |
| a) Loss of locomotor control | 18 |  | 6.61E-05 | -16.97 | -0.0002 | 1.00 |
|  | 24 |  | 1.00 | -14.66 | 0.62 | 0.43 |
|  | 30 |  | 0.74 | -0.48 | 0.72 | 0.40 |
| b) Onset of spasms | 18 |  | 6.61E-05 | -16.85 | -0.0002 | 1.00 |
| (CTmax) | 24 |  | 6.61E-05 | -15.98 | -0.0001 | 1.00 |
|  | 30 |  | 0.97 | -0.08 | 1.39 | 0.24 |
| c) Lethal | 18 |  | 6.61E-05 | -17.26 | -0.0002 | 1.00 |
| temperature | 24 |  | 6.61E-05 | -17.27 | -0.0002 | 1.00 |
|  | 30 |  | 1.00 | -0.49 | 2.26 | 0.13 |
| b) Onset of spasms | 18 |  | 6.61E-05 | -7.47 | -0.0002 | 1.00 |
| (CTmin) | 24 |  | 6.61E-05 | -12.57 | -0.0003 | 1.00 |
|  | 30 |  | 0.82 | 1.07 | 0.93 | 0.34 |
| e) Chill coma | 18 |  | 6.61E-05 | -11.02 | -0.0004 | 1.00 |
|  | 24 |  | 6.61E-05 | -14.54 | -0.0002 | 1.00 |
|  | 30 |  | 0.65 | -0.23 | 0.54 | 0.46 |
| f) Survival | 18 |  | 6.61E-05 | -11.83 | -0.0001 | 1.00 |
|  | 24 |  | 0.96 | -17.39 | 3.04 | 0.08 |
|  | 30 |  | 1.00 | -19.45 | 2.71 | 0.10 |
| g) Total Fecundity | 18 |  | 6.61E-05 | -15.65 | -0.0001 | 1.00 |
|  | 24 |  | 6.61E-05 | -14.92 | -1.65 | 1.00 |
|  | 30 |  | 0.96 | -15.39 | 1.51 | 0.22 |

**Table S5.** Results of multiple pair-wise comparisons using Tukey’s test for upper (a-c) and lower (d-e) physiological thermal tolerance limits (CTmax and CTmin, respectively) between status of the studied species (i.e., common (C), uncommon (U), and rare (R)) following exposure to 18 and 24 °C. Estimate, standard error (SE), *t*-value, and *P*-value (significance level; *P* = 0.05) adjusted with Benjamini-Hochberg correction are provided

| **CTmax** | | | | |
| --- | --- | --- | --- | --- |
| **a) Loss of locomotion control** | | | | |
| **Estimate SE  *t*-value *P-*value** | | | | |
| *Between status within acclimation temperature* | | | | |
| U.18 - C.18 == 0 -5.3636 0.3133 -17.119 < 2e-16 *** | | | | |
| R.18 - C.18 == 0 -3.4075 0.2867 -11.884 < 2e-16 *** | | | | |
| R.18 - U.18 == 0 1.9561 0.2908 6.727 2.16e-11 *** | | | | |
| U.24 - C.24 == 0 -3.6694 0.3141 -11.682 < 2e-16 *** | | | | |
| R.24 - C.24 == 0 -3.1639 0.2850 -11.100 < 2e-16 *** | | | | |
| R.24 - U.24 == 0 0.5055 0.2959 1.709 0.0875 . | | | | |
| *Between acclimation temperatures within status* | | | | |
| C.24 - C.18 == 0 2.4237 0.2935 8.258 3.33e-16 *** | | | | |
| U.24 - U.18 == 0 4.1179 0.3138 13.123 < 2e-16 *** | | | | |
| R.24 - R.18 == 0 2.6674 0.2688 9.925 < 2e-16 *** | | | | |
| *Between status and acclimation temperatures* | | | | |
| U.24 - C.18 == 0 -1.2457 0.3150 -3.955 8.84e-05 *** | | | | |
| R.24 - C.18 == 0 -0.7402 0.2855 -2.593 0.0102 * | | | | |
| C.24 - U.18 == 0 7.7873 0.3125 24.919 < 2e-16 *** | | | | |
| R.24 - U.18 == 0 4.6234 0.2950 15.672 < 2e-16 *** | | | | |
| C.24 - R.18 == 0 5.8313 0.2860 20.389 < 2e-16 *** | | | | |
| U.24 - R.18 == 0 2.1619 0.2912 7.425 1.54e-13 *** |  |  |  |  |
| **b) Onset of spasms** | | | | |
| **Estimate SE  *t*-value *P-*value** | | | | |
| *Between status within acclimation temperature* | | | | |
| U.18 - C.18 == 0 -3.9600 0.2629 -15.061 < 2e-16 *** | | | | |
| R.18 - C.18 == 0 -4.1477 0.2406 -17.238 < 2e-16 *** | | | | |
| R.18 - U.18 == 0 -0.1877 0.2440 -0.769 0.473396 | | | | |
| U.24 - C.24 == 0 -3.6777 0.2636 -13.952 < 2e-16 *** | | | | |
| R.24 - C.24 == 0 -3.7532 0.2392 -15.692 < 2e-16 *** | | | | |
| R.24 - U.24 == 0 -0.0755 0.2483 -0.304 0.761043 | | | | |
| *Between acclimation temperatures within status* | | | | |
| C.24 - C.18 == 0 0.9105 0.2463 3.697 0.000252 *** | | | | |
| U.24 - U.18 == 0 1.1928 0.2633 4.529 8.00e-06 *** | | | | |
| R.24 - R.18 == 0 1.3049 0.2255 5.786 1.20e-08 *** | | | | |
| *Between status and acclimation temperatures* | | | | |
| U.24 - C.18 == 0 -2.7673 0.2643 -10.469 < 2e-16 *** | | | | |
| R.24 - C.18 == 0 -2.8428 0.2396 -11.865 < 2e-16 *** | | | | |
| C.24 - U.18 == 0 4.8705 0.2622 18.572 < 2e-16 *** | | | | |
| R.24 - U.18 == 0 1.1173 0.2476 4.513 8.00e-06 *** | | | | |
| C.24 - R.18 == 0 5.0582 0.2400 21.075 < 2e-16 *** | | | | |
| U.24 - R.18 == 0 1.3804 0.2443 5.650 2.41e-08 *** | | | | |
| **c) Lethal temperature** | | | | |
| **Estimate SE  *t*-value *P-*value** | | | | |
| *Between status within acclimation temperature* | | | | |
| U.18 - C.18 == 0 -4.9016 0.2694 -18.197 < 2e-16 *** | | | | |
| R.18 - C.18 == 0 -3.8540 0.2465 -15.635 < 2e-16 *** | | | | |
| R.18 - U.18 == 0 1.0477 0.2500 4.191 4.63e-05 *** | | | | |
| U.24 - C.24 == 0 -5.0234 0.2701 -18.602 < 2e-16 *** | | | | |
| R.24 - C.24 == 0 -4.6898 0.2450 -19.138 < 2e-16 *** | | | | |
| R.24 - U.24 == 0 0.3337 0.2543 1.312 0.20313 | | | | |
| *Between acclimation temperatures within status* | | | | |
| C.24 - C.18 == 0 0.6479 0.2523 2.568 0.01395 * | | | | |
| U.24 - U.18 == 0 0.5262 0.2698 1.950 0.05900 . | | | | |
| R.24 - R.18 == 0 -0.1878 0.2311 -0.813 0.41624 | | | | |
| *Between status and acclimation temperatures* | | | | |
| U.24 - C.18 == 0 -4.3755 0.2708 -16.158 < 2e-16 *** | | | | |
| R.24 - C.18 == 0 -4.0418 0.2455 -16.467 < 2e-16 *** | | | | |
| C.24 - U.18 == 0 5.5496 0.2687 20.656 < 2e-16 *** | | | | |
| R.24 - U.18 == 0 0.8598 0.2536 3.390 0.00105 ** | | | | |
| C.24 - R.18 == 0 4.5019 0.2459 18.309 < 2e-16 *** | | | | |
| U.24 - R.18 == 0 -0.5215 0.2503 -2.083 0.04652 * | | | | |
| **CTmin** | | | | |
| **d) Onset of spasms** | |  |  |  |
| **Estimate SE  *t*-value *P-*value** | | | | |
| *Between status within acclimation temperature* | | | | |
| U.18 - C.18 == 0 0.05489 0.29347 0.187 0.8516 | | | | |
| R.18 - C.18 == 0 0.34235 0.27018 1.267 0.2564 | | | | |
| R.18 - U.18 == 0 0.28746 0.27294 1.053 0.3372 | | | | |
| U.24 - C.24 == 0 0.69985 0.29165 2.400 0.0246 * | | | | |
| R.24 - C.24 == 0 0.24466 0.26681 0.917 0.3848 | | | | |
| R.24 - U.24 == 0 -0.45519 0.27707 -1.643 0.1369 | | | | |
| *Between acclimation temperatures within status* | | | | |
| C.24 - C.18 == 0 2.28944 0.27573 8.303 < 2e-16 *** | | | | |
| U.24 - U.18 == 0 2.93440 0.29480 9.954 < 2e-16 *** | | | | |
| R.24 - R.18 == 0 2.19175 0.25368 8.640 < 2e-16 *** | | | | |
| *Between status and acclimation temperatures* | | | | |
| U.24 - C.18 == 0 2.98929 0.29225 10.229 < 2e-16 *** | | | | |
| R.24 - C.18 == 0 2.53410 0.26713 9.486 < 2e-16 *** | | | | |
| C.24 - U.18 == 0 2.23455 0.29282 7.631 4.37e-14 *** | | | | |
| R.24 - U.18 == 0 2.47921 0.27774 8.927 < 2e-16 *** | | | | |
| C.24 - R.18 == 0 1.94709 0.26953 7.224 8.42e-13 *** | | | | |
| U.24 - R.18 == 0 2.64694 0.27289 9.700 < 2e-16 *** |  |  |  |  |
| **e) Chill coma** | | | | |
| **Estimate SE  *t*-value *P-*value** | | | | |
| *Between status within acclimation temperature* | | | | |
| U.18 - C.18 == 0 0.2625 0.3288 0.798 0.490033 | | | | |
| R.18 - C.18 == 0 -0.1236 0.3027 -0.408 0.683078 | | | | |
| R.18 - U.18 == 0 -0.3861 0.3058 -1.262 0.281970 | | | | |
| U.24 - C.24 == 0 1.4041 0.3268 4.297 4.33e-05 *** | | | | |
| R.24 - C.24 == 0 1.0733 0.2990 3.590 0.000620 *** | | | | |
| R.24 - U.24 == 0 -0.3308 0.3105 -1.066 0.358264 | | | | |
| *Between acclimation temperatures within status* | | | | |
| C.24 - C.18 == 0 0.4070 0.3090 1.317 0.281599 | | | | |
| U.24 - U.18 == 0 1.5486 0.3303 4.688 8.27e-06 *** | | | | |
| R.24 - R.18 == 0 1.6039 0.2843 5.642 1.26e-07 *** | | | | |
| *Between status and acclimation temperatures* | | | | |
| U.24 - C.18 == 0 1.8111 0.3275 5.531 1.59e-07 *** | | | | |
| R.24 - C.18 == 0 1.4803 0.2993 4.946 2.85e-06 *** | | | | |
| C.24 - U.18 == 0 0.1445 0.3281 0.440 0.683078 | | | | |
| R.24 - U.18 == 0 1.2178 0.3112 3.913 0.000195 *** | | | | |
| C.24 - R.18 == 0 0.5306 0.3020 1.757 0.131568 | | | | |
| U.24 - R.18 == 0 1.9347 0.3058 6.327 3.74e-09 *** | | | | |

**Table S6.** Results of multiple pair-wise comparisons using Tukey’s test for upper (a-c) and lower (d-e) physiological thermal tolerance limits (CTmax and CTmin, respectively) between studied species of the genus *Ophryotrocha* following exposure to 18 and 24 °C. Estimate, standard error (SE), *t*-value, and *P*-value (significance level; *P* = 0.05) adjusted with Benjamini-Hochberg correction are provided

| **CTmax** | | |
| --- | --- | --- |
| **a) Loss of locomotion control** | | |
| **Estimate SE *t*-value *P-*value** | | |
| *Between acclimation temperatures within species* |  |  |
| O. labronica.24 - O. labronica.18 == 0 1.537091 0.250857 6.127 1.31e-09 *** | | |
| O. japonica.24 - O. japonica.18 == 0 3.280218 0.250429 13.098 < 2e-16 *** | | |
| O. adherens.24 - O. adherens.18 == 0 5.279855 0.289039 18.267 < 2e-16 *** | | |
| O. puerilis.24 - O. puerilis.18 == 0 3.194782 0.250429 12.757 < 2e-16 *** | | |
| O. hartmanni.24 - O. hartmanni.18 == 0 3.017946 0.321314 9.393 < 2e-16 *** | | |
| O. diadema.24 - O. diadema.18 == 0 2.047248 0.290022 7.059 2.59e-12 *** | | |
| O. robusta.24 - O. robusta.18 == 0 2.874510 0.251120 11.447 < 2e-16 *** | | |
| *Between species within acclimation temperature* | | |
| O. japonica.18 - O. labronica.18 == 0 -1.711744 0.260947 -6.560 8.04e-11 *** | | |
| O. adherens.18 - O. labronica.18 == 0 -7.420152 0.271848 -27.295 < 2e-16 *** | | |
| O. puerilis.18 - O. labronica.18 == 0 -5.923358 0.352555 -16.801 < 2e-16 *** | | |
| O. hartmanni.18 - O. labronica.18 == 0 -7.216906 0.370439 -19.482 < 2e-16 *** | | |
| O. diadema.18 - O. labronica.18 == 0 -2.725629 0.277326 -9.828 < 2e-16 *** | | |
| O. robusta.18 - O. labronica.18 == 0 -4.046362 0.256835 -15.755 < 2e-16 *** | | |
| O. adherens.18 - O. japonica.18 == 0 -5.708409 0.289196 -19.739 < 2e-16 *** | | |
| O. puerilis.18 - O. japonica.18 == 0 -4.211614 0.305035 -13.807 < 2e-16 *** | | |
| O. hartmanni.18 - O. japonica.18 == 0 -5.505162 0.325765 -16.899 < 2e-16 *** | | |
| O. diadema.18 - O. japonica.18 == 0 -1.013885 0.270573 -3.747 0.000206 *** | | |
| O. robusta.18 - O. japonica.18 == 0 -2.334619 0.250780 -9.309 < 2e-16 *** | | |
| O. puerilis.18 - O. adherens.18 == 0 1.496795 0.387179 3.866 0.000131 *** | | |
| O. diadema.18 - O. adherens.18 == 0 4.694523 0.302921 15.498 < 2e-16 *** | | |
| O. robusta.18 - O. adherens.18 == 0 3.373790 0.283851 11.886 < 2e-16 *** | | |
| O. hartmanni.18 - O. adherens.18 == 0 0.203247 0.403461 0.504 0.635378 | | |
| O. hartmanni.18 - O. puerilis.18 == 0 -1.293548 0.275773 -4.691 3.40e-06 *** | | |
| O. diadema.18 - O. puerilis.18 == 0 3.197729 0.328314 9.740 < 2e-16 *** | | |
| O. robusta.18 - O. puerilis.18 == 0 1.876995 0.314560 5.967 3.44e-09 *** | | |
| O. diadema.18 - O. hartmanni.18 == 0 4.491277 0.347625 12.920 < 2e-16 *** | | |
| O. robusta.18 - O. hartmanni.18 == 0 3.170543 0.334653 9.474 < 2e-16 *** | | |
| O. robusta.18 - O. diadema.18 == 0 -1.320733 0.270343 -4.885 1.32e-06 *** | | |
| O. japonica.24 - O. labronica.24 == 0 0.031383 0.254699 0.123 0.911958 | | |
| O. adherens.24 - O. labronica.24 == 0 -3.677389 0.273259 -13.458 < 2e-16 *** | | |
| O. puerilis.24 - O. labronica.24 == 0 -4.265667 0.346908 -12.296 < 2e-16 *** | | |
| O. puerilis.24 - O. adherens.24 == 0 -0.588278 0.389390 -1.511 0.138455 | | |
| O. hartmanni.24 - O. labronica.24 == 0 -5.736051 0.325832 -17.604 < 2e-16 *** | | |
| O. diadema.24 - O. labronica.24 == 0 -2.215472 0.271050 -8.174 3.61e-16 *** | | |
| O. robusta.24 - O. labronica.24 == 0 -2.708944 0.257636 -10.515 < 2e-16 *** | | |
| O. adherens.24 - O. japonica.24 == 0 -3.708772 0.284087 -13.055 < 2e-16 *** | | |
| O. puerilis.24 - O. japonica.24 == 0 -4.297050 0.315965 -13.600 < 2e-16 *** | | |
| O. hartmanni.24 - O. japonica.24 == 0 -5.767434 0.306842 -18.796 < 2e-16 *** | | |
| O. diadema.24 - O. japonica.24 == 0 -2.246855 0.271688 -8.270 3.61e-16 *** | | |
| O. robusta.24 - O. japonica.24 == 0 -2.740327 0.250642 -10.933 < 2e-16 *** | | |
| O. hartmanni.24 - O. adherens.24 == 0 -2.058662 0.360920 -5.704 1.57e-08 *** | | |
| O. diadema.24 - O. adherens.24 == 0 1.461917 0.295149 4.953 9.49e-07 *** | | |
| O. robusta.24 - O. adherens.24 == 0 0.968445 0.288652 3.355 0.000903 *** | | |
| O. hartmanni.24 - O. puerilis.24 == 0 -1.470384 0.302577 -4.860 1.49e-06 *** | | |
| O. diadema.24 - O. puerilis.24 == 0 2.050195 0.348661 5.880 5.74e-09 *** | | |
| O. robusta.24 - O. puerilis.24 == 0 1.556723 0.307700 5.059 5.55e-07 *** | | |
| O. diadema.24 - O. hartmanni.24 == 0 3.520579 0.333134 10.568 < 2e-16 *** | | |
| O. robusta.24 - O. hartmanni.24 == 0 3.027107 0.302463 10.008 < 2e-16 *** | | |
| O. robusta.24 - O. diadema.24 == 0 -0.493472 0.273431 -1.805 0.076135 . | | |
| *Among species and acclimation temperatures* | | |
| O. japonica.24 - O. labronica.18 == 0 1.568474 0.258482 6.068 1.87e-09 *** | | |
| O. adherens.24 - O. labronica.18 == 0 -2.140298 0.271263 -7.890 4.96e-15 *** | | |
| O. puerilis.24 - O. labronica.18 == 0 -2.728575 0.359123 -7.598 4.74e-14 *** | | |
| O. hartmanni.24 - O. labronica.18 == 0 -4.198960 0.334190 -12.565 < 2e-16 *** | | |
| O. diadema.24 - O. labronica.18 == 0 -0.678381 0.272877 -2.486 0.014336 * | | |
| O. robusta.24 - O. labronica.18 == 0 -1.171853 0.262293 -4.468 9.59e-06 *** | | |
| O. labronica.24 - O. japonica.18 == 0 3.248835 0.256578 12.662 < 2e-16 *** | | |
| O. adherens.24 - O. japonica.18 == 0 -0.428554 0.287064 -1.493 0.141695 | | |
| O. puerilis.24 - O. japonica.18 == 0 -1.016832 0.310411 -3.276 0.001184 ** | | |
| O. hartmanni.24 - O. japonica.18 == 0 -2.487216 0.303859 -8.185 3.61e-16 *** | | |
| O. diadema.24 - O. japonica.18 == 0 1.033363 0.272773 3.788 0.000177 *** | | |
| O. robusta.24 - O. japonica.18 == 0 0.539891 0.250301 2.157 0.033997 * | | |
| O. labronica.24 - O. adherens.18 == 0 8.957244 0.274230 32.663 < 2e-16 *** | | |
| O. japonica.24 - O. adherens.18 == 0 8.988627 0.286042 31.424 < 2e-16 *** | | |
| O. puerilis.24 - O. adherens.18 == 0 4.691577 0.393847 11.912 < 2e-16 *** | | |
| O. hartmanni.24 - O. adherens.18 == 0 3.221193 0.364210 8.844 < 2e-16 *** | | |
| O. diadema.24 - O. adherens.18 == 0 6.741771 0.296464 22.741 < 2e-16 *** | | |
| O. robusta.24 - O. adherens.18 == 0 6.248300 0.290870 21.481 < 2e-16 *** | | |
| O. labronica.24 - O. puerilis.18 == 0 7.460449 0.340574 21.906 < 2e-16 *** | | |
| O. japonica.24 - O. puerilis.18 == 0 7.491832 0.310411 24.135 < 2e-16 *** | | |
| O. adherens.24 - O. puerilis.18 == 0 3.783060 0.382793 9.883 < 2e-16 *** | | |
| O. hartmanni.24 - O. puerilis.18 == 0 1.724398 0.299967 5.749 1.24e-08 *** | | |
| O. diadema.24 - O. puerilis.18 == 0 5.244977 0.342900 15.296 < 2e-16 *** | | |
| O. robusta.24 - O. puerilis.18 == 0 4.751505 0.302418 15.712 < 2e-16 *** | | |
| O. labronica.24 - O. hartmanni.18 == 0 8.753997 0.359103 24.377 < 2e-16 *** | | |
| O. japonica.24 - O. hartmanni.18 == 0 8.785380 0.330776 26.560 < 2e-16 *** | | |
| O. adherens.24 - O. diadema.18 == 0 0.585331 0.301131 1.944 0.056249 . | | |
| O. adherens.24 - O. hartmanni.18 == 0 5.076608 0.399269 12.715 < 2e-16 *** | | |
| O. puerilis.24 - O. diadema.18 == 0 -0.002947 0.333645 -0.009 0.992953 | | |
| O. puerilis.24 - O. hartmanni.18 == 0 4.488330 0.275961 16.264 < 2e-16 *** | | |
| O. diadema.24 - O. hartmanni.18 == 0 6.538525 0.361364 18.094 < 2e-16 *** | | |
| O. robusta.24 - O. hartmanni.18 == 0 6.045053 0.323329 18.696 < 2e-16 *** | | |
| O. labronica.24 - O. diadema.18 == 0 4.262720 0.273974 15.559 < 2e-16 *** | | |
| O. japonica.24 - O. diadema.18 == 0 4.294103 0.270323 15.885 < 2e-16 *** | | |
| O. hartmanni.24 - O. diadema.18 == 0 -1.473331 0.324274 -4.543 6.80e-06 *** | | |
| O. robusta.24 - O. diadema.18 == 0 1.553776 0.270816 5.737 1.31e-08 *** | | |
| O. labronica.24 - O. robusta.18 == 0 5.583454 0.253502 22.025 < 2e-16 *** | | |
| O. japonica.24 - O. robusta.18 == 0 5.614837 0.250354 22.428 < 2e-16 *** | | |
| O. adherens.24 - O. robusta.18 == 0 1.906065 0.282032 6.758 2.12e-11 *** | | |
| O. puerilis.24 - O. robusta.18 == 0 1.317787 0.320243 4.115 4.64e-05 *** | | |
| O. hartmanni.24 - O. robusta.18 == 0 -0.152597 0.309241 -0.493 0.635660 | | |
| O. diadema.24 - O. robusta.18 == 0 3.367981 0.271079 12.424 < 2e-16 *** | | |
| **b) Onset of spasms** | | |
| **Estimate SE *t*-value *P-*value** | | |
| *Between acclimation temperatures within species* | | |
| O. labronica.24 - O. labronica.18 == 0 0.824433 0.204622 4.029 7.08e-05 *** | | |
| O. japonica.24 - O. japonica.18 == 0 0.907969 0.204273 4.445 1.13e-05 *** | | |
| O. adherens.24 - O. adherens.18 == 0 0.004687 0.235767 0.020 0.984138 | | |
| O. puerilis.24 - O. puerilis.18 == 0 1.932031 0.204273 9.458 < 2e-16 *** | | |
| O. hartmanni.24 - O. hartmanni.18 == 0 1.011252 0.262093 3.858 0.000137 *** | | |
| O. diadema.24 - O. diadema.18 == 0 0.927918 0.236568 3.922 0.000108 *** | | |
| O. robusta.24 - O. robusta.18 == 0 2.203320 0.204837 10.756 < 2e-16 *** | | |
| *Between species within acclimation temperature* | | |
| O. japonica.18 - O. labronica.18 == 0 -0.748753 0.212852 -3.518 0.000501 *** | | |
| O. adherens.18 - O. labronica.18 == 0 -2.685722 0.221744 -12.112 < 2e-16 *** | | |
| O. puerilis.18 - O. labronica.18 == 0 -7.344794 0.287576 -25.540 < 2e-16 *** | | |
| O. hartmanni.18 - O. labronica.18 == 0 -7.400190 0.302164 -24.491 < 2e-16 *** | | |
| O. diadema.18 - O. labronica.18 == 0 -3.354918 0.226212 -14.831 < 2e-16 *** | | |
| O. robusta.18 - O. labronica.18 == 0 -5.428557 0.209498 -25.912 < 2e-16 *** | | |
| O. adherens.18 - O. japonica.18 == 0 -1.936969 0.235895 -8.211 3.11e-16 *** | | |
| O. puerilis.18 - O. japonica.18 == 0 -6.596042 0.248815 -26.510 < 2e-16 *** | | |
| O. hartmanni.18 - O. japonica.18 == 0 -6.651438 0.265724 -25.031 < 2e-16 *** | | |
| O. diadema.18 - O. japonica.18 == 0 -2.606165 0.220704 -11.808 < 2e-16 *** | | |
| O. robusta.18 - O. japonica.18 == 0 -4.679804 0.204559 -22.878 < 2e-16 *** | | |
| O. puerilis.18 - O. adherens.18 == 0 -4.659073 0.315819 -14.752 < 2e-16 *** | | |
| O. hartmanni.18 - O. adherens.18 == 0 -4.714469 0.329099 -14.325 < 2e-16 *** | | |
| O. diadema.18 - O. adherens.18 == 0 -0.669196 0.247090 -2.708 0.007505 ** | | |
| O. robusta.18 - O. adherens.18 == 0 -2.742835 0.231535 -11.846 < 2e-16 *** | | |
| O. hartmanni.18 - O. puerilis.18 == 0 -0.055396 0.224946 -0.246 0.823578 | | |
| O. diadema.18 - O. puerilis.18 == 0 3.989877 0.267803 14.899 < 2e-16 *** | | |
| O. robusta.18 - O. puerilis.18 == 0 1.916237 0.256584 7.468 1.07e-13 *** | | |
| O. diadema.18 - O. hartmanni.18 == 0 4.045273 0.283554 14.266 < 2e-16 *** | | |
| O. robusta.18 - O. hartmanni.18 == 0 1.971634 0.272973 7.223 6.62e-13 *** | | |
| O. robusta.18 - O. diadema.18 == 0 -2.073639 0.220516 -9.404 < 2e-16 *** | | |
| O. japonica.24 - O. labronica.24 == 0 -0.665217 0.207756 -3.202 0.001553 ** | | |
| O. adherens.24 - O. labronica.24 == 0 -3.505467 0.222895 -15.727 < 2e-16 *** | | |
| O. puerilis.24 - O. labronica.24 == 0 -6.237196 0.282969 -22.042 < 2e-16 *** | | |
| O. hartmanni.24 - O. labronica.24 == 0 -7.213371 0.265778 -27.141 < 2e-16 *** | | |
| O. diadema.24 - O. labronica.24 == 0 -3.251433 0.221093 -14.706 < 2e-16 *** | | |
| O. robusta.24 - O. labronica.24 == 0 -4.049670 0.210152 -19.270 < 2e-16 *** | | |
| O. adherens.24 - O. japonica.24 == 0 -2.840251 0.231727 -12.257 < 2e-16 *** | | |
| O. puerilis.24 - O. japonica.24 == 0 -5.571980 0.257730 -21.619 < 2e-16 *** | | |
| O. hartmanni.24 - O. japonica.24 == 0 -6.548155 0.250288 -26.162 < 2e-16 *** | | |
| O. diadema.24 - O. japonica.24 == 0 -2.586216 0.221614 -11.670 < 2e-16 *** | | |
| O. robusta.24 - O. japonica.24 == 0 -3.384454 0.204446 -16.554 < 2e-16 *** | | |
| O. puerilis.24 - O. adherens.24 == 0 -2.731729 0.317622 -8.601 < 2e-16 *** | | |
| O. hartmanni.24 - O. adherens.24 == 0 -3.707904 0.294399 -12.595 < 2e-16 *** | | |
| O. diadema.24 - O. adherens.24 == 0 0.254034 0.240750 1.055 0.308283 | | |
| O. robusta.24 - O. adherens.24 == 0 -0.544203 0.235451 -2.311 0.022821 * | | |
| O. hartmanni.24 - O. puerilis.24 == 0 -0.976175 0.246809 -3.955 9.53e-05 *** | | |
| O. diadema.24 - O. puerilis.24 == 0 2.985763 0.284400 10.498 < 2e-16 *** | | |
| O. robusta.24 - O. puerilis.24 == 0 2.187526 0.250988 8.716 < 2e-16 *** | | |
| O. diadema.24 - O. hartmanni.24 == 0 3.961938 0.271734 14.580 < 2e-16 *** | | |
| O. robusta.24 - O. hartmanni.24 == 0 3.163701 0.246716 12.823 < 2e-16 *** | | |
| O. robusta.24 - O. diadema.24 == 0 -0.798237 0.223035 -3.579 0.000402 *** | | |
| *Among species and exposure temperatures* | | |
| O. japonica.24 - O. labronica.18 == 0 0.159216 0.210841 0.755 0.470857 | | |
| O. adherens.24 - O. labronica.18 == 0 -2.681034 0.221267 -12.117 < 2e-16 *** | | |
| O. puerilis.24 - O. labronica.18 == 0 -5.412763 0.292934 -18.478 < 2e-16 *** | | |
| O. hartmanni.24 - O. labronica.18 == 0 -6.388938 0.272596 -23.437 < 2e-16 *** | | |
| O. diadema.24 - O. labronica.18 == 0 -2.427000 0.222584 -10.904 < 2e-16 *** | | |
| O. robusta.24 - O. labronica.18 == 0 -3.225237 0.213950 -15.075 < 2e-16 *** | | |
| O. labronica.24 - O. japonica.18 == 0 1.573186 0.209288 7.517 7.52e-14 *** | | |
| O. adherens.24 - O. japonica.18 == 0 -1.932282 0.234156 -8.252 3.11e-16 *** | | |
| O. puerilis.24 - O. japonica.18 == 0 -4.664011 0.253199 -18.420 < 2e-16 *** | | |
| O. hartmanni.24 - O. japonica.18 == 0 -5.640186 0.247855 -22.756 < 2e-16 *** | | |
| O. diadema.24 - O. japonica.18 == 0 -1.678247 0.222499 -7.543 6.24e-14 *** | | |
| O. robusta.24 - O. japonica.18 == 0 -2.476485 0.204168 -12.130 < 2e-16 *** | | |
| O. labronica.24 - O. adherens.18 == 0 3.510155 0.223687 15.692 < 2e-16 *** | | |
| O. japonica.24 - O. adherens.18 == 0 2.844938 0.233322 12.193 < 2e-16 *** | | |
| O. puerilis.24 - O. adherens.18 == 0 -2.727042 0.321258 -8.489 < 2e-16 *** | | |
| O. hartmanni.24 - O. adherens.18 == 0 -3.703217 0.297083 -12.465 < 2e-16 *** | | |
| O. diadema.24 - O. adherens.18 == 0 0.258722 0.241823 1.070 0.304768 | | |
| O. robusta.24 - O. adherens.18 == 0 -0.539516 0.237260 -2.274 0.024884 * | | |
| O. labronica.24 - O. puerilis.18 == 0 8.169227 0.277803 29.407 < 2e-16 *** | | |
| O. japonica.24 - O. puerilis.18 == 0 7.504011 0.253199 29.637 < 2e-16 *** | | |
| O. adherens.24 - O. puerilis.18 == 0 4.663760 0.312241 14.936 < 2e-16 *** | | |
| O. hartmanni.24 - O. puerilis.18 == 0 0.955856 0.244681 3.907 0.000114 *** | | |
| O. diadema.24 - O. puerilis.18 == 0 4.917794 0.279700 17.582 < 2e-16 *** | | |
| O. robusta.24 - O. puerilis.18 == 0 4.119557 0.246679 16.700 < 2e-16 *** | | |
| O. labronica.24 - O. hartmanni.18 == 0 8.224623 0.292917 28.078 < 2e-16 *** | | |
| O. japonica.24 - O. hartmanni.18 == 0 7.559407 0.269811 28.017 < 2e-16 *** | | |
| O. adherens.24 - O. hartmanni.18 == 0 4.719156 0.325680 14.490 < 2e-16 *** | | |
| O. puerilis.24 - O. hartmanni.18 == 0 1.987427 0.225099 8.829 < 2e-16 *** | | |
| O. diadema.24 - O. hartmanni.18 == 0 4.973190 0.294762 16.872 < 2e-16 *** | | |
| O. robusta.24 - O. hartmanni.18 == 0 4.174953 0.263737 15.830 < 2e-16 *** | | |
| O. labronica.24 - O. diadema.18 == 0 4.179351 0.223478 18.701 < 2e-16 *** | | |
| O. japonica.24 - O. diadema.18 == 0 3.514134 0.220500 15.937 < 2e-16 *** | | |
| O. adherens.24 - O. diadema.18 == 0 0.673883 0.245630 2.743 0.006829 ** | | |
| O. puerilis.24 - O. diadema.18 == 0 -2.057846 0.272152 -7.561 5.51e-14 *** | | |
| O. hartmanni.24 - O. diadema.18 == 0 -3.034021 0.264507 -11.470 < 2e-16 *** | | |
| O. robusta.24 - O. diadema.18 == 0 0.129680 0.220902 0.587 0.576166 | | |
| O. labronica.24 - O. robusta.18 == 0 6.252990 0.206780 30.240 < 2e-16 *** | | |
| O. japonica.24 - O. robusta.18 == 0 5.587773 0.204212 27.363 < 2e-16 *** | | |
| O. adherens.24 - O. robusta.18 == 0 2.747522 0.230051 11.943 < 2e-16 *** | | |
| O. puerilis.24 - O. robusta.18 == 0 0.015793 0.261219 0.060 0.962364 | | |
| O. hartmanni.24 - O. robusta.18 == 0 -0.960382 0.252245 -3.807 0.000166 *** | | |
| O. diadema.24 - O. robusta.18 == 0 3.001557 0.221117 13.575 < 2e-16 *** | | |
| **c) Lethal temperature** | | |
| **Estimate SE *t*-value *P-*value** | | |
| *Between acclimation temperatures within species* | | |
| O. labronica.24 - O. labronica.18 == 0 0.547362 0.194209 2.818 0.005490 ** | | |
| O. japonica.24 - O. japonica.18 == 0 0.654074 0.193877 3.374 0.000865 *** | | |
| O. adherens.24 - O. adherens.18 == 0 0.363951 0.223768 1.626 0.107391 | | |
| O. puerilis.24 - O. puerilis.18 == 0 0.485926 0.193877 2.506 0.013537 * | | |
| O. hartmanni.24 - O. hartmanni.18 == 0 0.461228 0.248755 1.854 0.066648 . | | |
| O. diadema.24 - O. diadema.18 == 0 -0.722471 0.224529 -3.218 0.001488 ** | | |
| O. robusta.24 - O. robusta.18 == 0 0.230835 0.194412 1.187 0.240375 | | |
| *Between species within acclimation temperature* | | |
| O. japonica.18 - O. labronica.18 == 0 -1.112588 0.202020 -5.507 4.60e-08 *** | | |
| O. adherens.18 - O. labronica.18 == 0 -4.465603 0.210459 -21.218 < 2e-16 *** | | |
| O. puerilis.18 - O. labronica.18 == 0 -8.094477 0.272941 -29.657 < 2e-16 *** | | |
| O. hartmanni.18 - O. labronica.18 == 0 -8.096897 0.286786 -28.233 < 2e-16 *** | | |
| O. diadema.18 - O. labronica.18 == 0 -2.792327 0.214700 -13.006 < 2e-16 *** | | |
| O. robusta.18 - O. labronica.18 == 0 -5.225460 0.198837 -26.280 < 2e-16 *** | | |
| O. adherens.18 - O. japonica.18 == 0 -3.353015 0.223890 -14.976 < 2e-16 *** | | |
| O. puerilis.18 - O. japonica.18 == 0 -6.981888 0.236152 -29.565 < 2e-16 *** | | |
| O. hartmanni.18 - O. japonica.18 == 0 -6.984309 0.252201 -27.693 < 2e-16 *** | | |
| O. diadema.18 - O. japonica.18 == 0 -1.679738 0.209472 -8.019 1.49e-15 *** | | |
| O. robusta.18 - O. japonica.18 == 0 -4.112871 0.194149 -21.184 < 2e-16 *** | | |
| O. puerilis.18 - O. adherens.18 == 0 -3.628873 0.299746 -12.106 < 2e-16 *** | | |
| O. hartmanni.18 - O. adherens.18 == 0 -3.631294 0.312351 -11.626 < 2e-16 *** | | |
| O. diadema.18 - O. adherens.18 == 0 1.673277 0.234515 7.135 1.28e-12 *** | | |
| O. robusta.18 - O. adherens.18 == 0 -0.759856 0.219752 -3.458 0.000644 *** | | |
| O. hartmanni.18 - O. puerilis.18 == 0 -0.002421 0.213498 -0.011 0.990954 | | |
| O. diadema.18 - O. puerilis.18 == 0 5.302150 0.254174 20.860 < 2e-16 *** | | |
| O. robusta.18 - O. puerilis.18 == 0 2.869017 0.243526 11.781 < 2e-16 *** | | |
| O. diadema.18 - O. hartmanni.18 == 0 5.304571 0.269124 19.711 < 2e-16 *** | | |
| O. robusta.18 - O. hartmanni.18 == 0 2.871438 0.259081 11.083 < 2e-16 *** | | |
| O. robusta.18 - O. diadema.18 == 0 -2.433133 0.209294 -11.625 < 2e-16 *** | | |
| O. japonica.24 - O. labronica.24 == 0 -1.005877 0.197183 -5.101 4.15e-07 *** | | |
| O. adherens.24 - O. labronica.24 == 0 -4.649015 0.211552 -21.976 < 2e-16 *** | | |
| O. puerilis.24 - O. labronica.24 == 0 -8.155912 0.268569 -30.368 < 2e-16 *** | | |
| O. hartmanni.24 - O. labronica.24 == 0 -8.183032 0.252253 -32.440 < 2e-16 *** | | |
| O. diadema.24 - O. labronica.24 == 0 -4.062159 0.209842 -19.358 < 2e-16 *** | | |
| O. robusta.24 - O. labronica.24 == 0 -5.541987 0.199457 -27.785 < 2e-16 *** | | |
| O. adherens.24 - O. japonica.24 == 0 -3.643138 0.219934 -16.565 < 2e-16 *** | | |
| O. puerilis.24 - O. japonica.24 == 0 -7.150035 0.244614 -29.230 < 2e-16 *** | | |
| O. hartmanni.24 - O. japonica.24 == 0 -7.177155 0.237551 -30.213 < 2e-16 *** | | |
| O. diadema.24 - O. japonica.24 == 0 -3.056282 0.210336 -14.530 < 2e-16 *** | | |
| O. robusta.24 - O. japonica.24 == 0 -4.536110 0.194042 -23.377 < 2e-16 *** | | |
| O. puerilis.24 - O. adherens.24 == 0 -3.506898 0.301458 -11.633 < 2e-16 *** | | |
| O. hartmanni.24 - O. adherens.24 == 0 -3.534017 0.279417 -12.648 < 2e-16 *** | | |
| O. diadema.24 - O. adherens.24 == 0 0.586855 0.228498 2.568 0.011481 * | | |
| O. robusta.24 - O. adherens.24 == 0 -0.892973 0.223469 -3.996 7.71e-05 *** | | |
| O. hartmanni.24 - O. puerilis.24 == 0 -0.027119 0.234249 -0.116 0.917921 | | |
| O. diadema.24 - O. puerilis.24 == 0 4.093753 0.269926 15.166 < 2e-16 *** | | |
| O. robusta.24 - O. puerilis.24 == 0 2.613925 0.238215 10.973 < 2e-16 *** | | |
| O. diadema.24 - O. hartmanni.24 == 0 4.120872 0.257905 15.978 < 2e-16 *** | | |
| O. robusta.24 - O. hartmanni.24 == 0 2.641044 0.234161 11.279 < 2e-16 *** | | |
| O. robusta.24 - O. diadema.24 == 0 -1.479828 0.211685 -6.991 3.56e-12 *** | | |
| *Among species and acclimation temperatures* | | |
| O. japonica.24 - O. labronica.18 == 0 -0.458515 0.200111 -2.291 0.023775 * | | |
| O. adherens.24 - O. labronica.18 == 0 -4.101653 0.210006 -19.531 < 2e-16 *** | | |
| O. puerilis.24 - O. labronica.18 == 0 -7.608550 0.278026 -27.366 < 2e-16 *** | | |
| O. hartmanni.24 - O. labronica.18 == 0 -7.635669 0.258723 -29.513 < 2e-16 *** | | |
| O. diadema.24 - O. labronica.18 == 0 -3.514797 0.211256 -16.638 < 2e-16 *** | | |
| O. robusta.24 - O. labronica.18 == 0 -4.994625 0.203062 -24.597 < 2e-16 *** | | |
| O. labronica.24 - O. japonica.18 == 0 1.659950 0.198637 8.357 < 2e-16 *** | | |
| O. puerilis.24 - O. adherens.18 == 0 -3.142947 0.304909 -10.308 < 2e-16 *** | | |
| O. hartmanni.24 - O. adherens.18 == 0 -3.170066 0.281964 -11.243 < 2e-16 *** | | |
| O. diadema.24 - O. adherens.18 == 0 0.950806 0.229516 4.143 4.17e-05 *** | | |
| O. robusta.24 - O. adherens.18 == 0 -0.529022 0.225186 -2.349 0.020623 * | | |
| O. labronica.24 - O. puerilis.18 == 0 8.641839 0.263665 32.776 < 2e-16 *** | | |
| O. japonica.24 - O. puerilis.18 == 0 7.635962 0.240314 31.775 < 2e-16 *** | | |
| O. adherens.24 - O. puerilis.18 == 0 3.992824 0.296351 13.473 < 2e-16 *** | | |
| O. hartmanni.24 - O. puerilis.18 == 0 0.458807 0.232229 1.976 0.050994 . | | |
| O. diadema.24 - O. puerilis.18 == 0 4.579679 0.265466 17.251 < 2e-16 *** | | |
| O. robusta.24 - O. puerilis.18 == 0 3.099851 0.234126 13.240 < 2e-16 *** | | |
| O. labronica.24 - O. hartmanni.18 == 0 8.644259 0.278010 31.093 < 2e-16 *** | | |
| O. japonica.24 - O. hartmanni.18 == 0 7.638382 0.256080 29.828 < 2e-16 *** | | |
| O. adherens.24 - O. hartmanni.18 == 0 3.995245 0.309106 12.925 < 2e-16 *** | | |
| O. puerilis.24 - O. hartmanni.18 == 0 0.488347 0.213643 2.286 0.023837 * | | |
| O. diadema.24 - O. hartmanni.18 == 0 4.582100 0.279761 16.379 < 2e-16 *** | | |
| O. robusta.24 - O. hartmanni.18 == 0 3.102272 0.250315 12.393 < 2e-16 *** | | |
| O. labronica.24 - O. diadema.18 == 0 3.339689 0.212105 15.745 < 2e-16 *** | | |
| O. japonica.24 - O. diadema.18 == 0 2.333812 0.209279 11.152 < 2e-16 *** | | |
| O. adherens.24 - O. diadema.18 == 0 -1.309326 0.233129 -5.616 2.50e-08 *** | | |
| O. puerilis.24 - O. diadema.18 == 0 -4.816223 0.258302 -18.646 < 2e-16 *** | | |
| O. hartmanni.24 - O. diadema.18 == 0 -4.843343 0.251046 -19.293 < 2e-16 *** | | |
| O. robusta.24 - O. diadema.18 == 0 -2.202298 0.209661 -10.504 < 2e-16 *** | | |
| O. labronica.24 - O. robusta.18 == 0 5.772822 0.196256 29.415 < 2e-16 *** | | |
| O. japonica.24 - O. robusta.18 == 0 4.766945 0.193819 24.595 < 2e-16 *** | | |
| O. adherens.24 - O. robusta.18 == 0 1.123807 0.218344 5.147 3.30e-07 *** | | |
| O. puerilis.24 - O. robusta.18 == 0 -2.383091 0.247926 -9.612 < 2e-16 *** | | |
| O. hartmanni.24 - O. robusta.18 == 0 -2.410210 0.239408 -10.067 < 2e-16 *** | | |
| O. diadema.24 - O. robusta.18 == 0 1.710662 0.209864 8.151 6.03e-16 *** | | |
| **CTmin** | | |
| **d) Onset of spasms** | | |
| **Estimate SE *t*-value *P-*value** | | |
| *Between acclimation temperatures within species* |  |  |
| O. labronica.24 - O. labronica.18 == 0 1.23855 0.22655 5.467 8.17e-08 *** | | |
| O. japonica.24 - O. japonica.18 == 0 3.31987 0.22615 14.680 < 2e-16 *** | | |
| O. adherens.24 - O. adherens.18 == 0 4.20000 0.26087 16.100 < 2e-16 *** | | |
| O. puerilis.24 - O. puerilis.18 == 0 2.01930 0.22620 8.927 < 2e-16 *** | | |
| O. hartmanni.24 - O. hartmanni.18 == 0 3.31520 0.29041 11.416 < 2e-16 *** | | |
| O. diadema.24 - O. diadema.18 == 0 2.43392 0.26115 9.320 < 2e-16 *** | | |
| O. robusta.24 - O. robusta.18 == 0 1.68474 0.22682 7.428 2.45e-13 *** | | |
| *Between species within acclimation temperature* | | |
| O. japonica.18 - O. labronica.18 == 0 -0.66194 0.23509 -2.816 0.006513 ** | | |
| O. adherens.18 - O. labronica.18 == 0 0.50852 0.24576 2.069 0.044384 * | | |
| O. puerilis.18 - O. labronica.18 == 0 -1.29329 0.31512 -4.104 6.05e-05 *** | | |
| O. hartmanni.18 - O. labronica.18 == 0 0.63772 0.34770 1.834 0.075804 . | | |
| O. diadema.18 - O. labronica.18 == 0 -1.04910 0.24746 -4.239 3.40e-05 *** | | |
| O. robusta.18 - O. labronica.18 == 0 -0.18422 0.23389 -0.788 0.455953 | | |
| O. adherens.18 - O. japonica.18 == 0 1.17046 0.26156 4.475 1.20e-05 *** | | |
| O. puerilis.18 - O. japonica.18 == 0 -0.63135 0.27380 -2.306 0.025966 * | | |
| O. hartmanni.18 - O. japonica.18 == 0 1.29966 0.30588 4.249 3.31e-05 *** | | |
| O. diadema.18 - O. japonica.18 == 0 -0.38716 0.24519 -1.579 0.125360 | | |
| O. robusta.18 - O. japonica.18 == 0 0.47772 0.22597 2.114 0.040258 * | | |
| O. puerilis.18 - O. adherens.18 == 0 -1.80181 0.34851 -5.170 3.94e-07 *** | | |
| O. hartmanni.18 - O. adherens.18 == 0 0.12920 0.38000 0.340 0.733853 | | |
| O. diadema.18 - O. adherens.18 == 0 -1.55762 0.27016 -5.765 1.51e-08 *** | | |
| O. robusta.18 - O. adherens.18 == 0 -0.69274 0.25998 -2.665 0.009753 ** | | |
| O. hartmanni.18 - O. puerilis.18 == 0 1.93101 0.25002 7.723 2.58e-14 *** | | |
| O. diadema.18 - O. puerilis.18 == 0 0.24419 0.30239 0.808 0.448956 | | |
| O. robusta.18 - O. puerilis.18 == 0 1.10907 0.27635 4.013 8.79e-05 *** | | |
| O. diadema.18 - O. hartmanni.18 == 0 -1.68682 0.33338 -5.060 6.82e-07 *** | | |
| O. robusta.18 - O. hartmanni.18 == 0 -0.82194 0.30851 -2.664 0.009753 ** | | |
| O. robusta.18 - O. diadema.18 == 0 0.86488 0.24480 3.533 0.000584 *** | | |
| O. japonica.24 - O. labronica.24 == 0 1.41938 0.22911 6.195 1.15e-09 *** | | |
| O. adherens.24 - O. labronica.24 == 0 3.46997 0.24831 13.974 < 2e-16 *** | | |
| O. puerilis.24 - O. labronica.24 == 0 -0.51254 0.29626 -1.730 0.092807 . | | |
| O. hartmanni.24 - O. labronica.24 == 0 2.71437 0.30233 8.978 < 2e-16 *** | | |
| O. diadema.24 - O. labronica.24 == 0 0.14627 0.24434 0.599 0.568144 | | |
| O. robusta.24 - O. labronica.24 == 0 0.26197 0.22715 1.153 0.269519 | | |
| O. adherens.24 - O. japonica.24 == 0 2.05059 0.25810 7.945 4.66e-15 *** | | |
| O. puerilis.24 - O. japonica.24 == 0 -1.93192 0.27316 -7.072 3.30e-12 *** | | |
| O. hartmanni.24 - O. japonica.24 == 0 1.29499 0.28497 4.544 8.80e-06 *** | | |
| O. diadema.24 - O. japonica.24 == 0 -1.27311 0.24538 -5.188 3.69e-07 *** | | |
| O. robusta.24 - O. japonica.24 == 0 -1.15741 0.22639 -5.112 5.26e-07 *** | | |
| O. puerilis.24 - O. adherens.24 == 0 -3.98251 0.34060 -11.693 < 2e-16 *** | | |
| O. hartmanni.24 - O. adherens.24 == 0 -0.75560 0.34068 -2.218 0.032229 * | | |
| O. diadema.24 - O. adherens.24 == 0 -3.32370 0.26731 -12.434 < 2e-16 *** | | |
| O. robusta.24 - O. adherens.24 == 0 -3.20800 0.25373 -12.644 < 2e-16 *** | | |
| O. hartmanni.24 - O. puerilis.24 == 0 3.22691 0.26375 12.235 < 2e-16 *** | | |
| O. diadema.24 - O. puerilis.24 == 0 0.65881 0.30283 2.176 0.034972 * | | |
| O. robusta.24 - O. puerilis.24 == 0 0.77451 0.28161 2.750 0.007853 ** | | |
| O. diadema.24 - O. hartmanni.24 == 0 -2.56810 0.31031 -8.276 5.32e-16 *** | | |
| O. robusta.24 - O. hartmanni.24 == 0 -2.45240 0.29114 -8.423 < 2e-16 *** | | |
| O. robusta.24 - O. diadema.24 == 0 0.11570 0.24428 0.474 0.650052 | | |
| *Among species and acclimation temperatures* | | |
| O. japonica.24 - O. labronica.18 == 0 2.65793 0.23250 11.432 < 2e-16 *** | | |
| O. adherens.24 - O. labronica.18 == 0 4.70852 0.24576 19.159 < 2e-16 *** | | |
| O. puerilis.24 - O. labronica.18 == 0 0.72601 0.30741 2.362 0.022676 * | | |
| O. hartmanni.24 - O. labronica.18 == 0 3.95292 0.31116 12.704 < 2e-16 *** | | |
| O. diadema.24 - O. labronica.18 == 0 1.38482 0.24576 5.635 3.19e-08 *** | | |
| O. robusta.24 - O. labronica.18 == 0 1.50052 0.22950 6.538 1.32e-10 *** | | |
| O. labronica.24 - O. japonica.18 == 0 1.90049 0.23101 8.227 5.32e-16 *** | | |
| O. adherens.24 - O. japonica.18 == 0 5.37046 0.26156 20.533 < 2e-16 *** | | |
| O. puerilis.24 - O. japonica.18 == 0 1.38795 0.26762 5.186 3.69e-07 *** | | |
| O. hartmanni.24 - O. japonica.18 == 0 4.61486 0.28107 16.419 < 2e-16 *** | | |
| O. diadema.24 - O. japonica.18 == 0 2.04676 0.24665 8.298 < 2e-16 *** | | |
| O. robusta.24 - O. japonica.18 == 0 2.16246 0.22727 9.515 < 2e-16 *** | | |
| O. labronica.24 - O. adherens.18 == 0 0.73003 0.24831 2.940 0.004458 ** | | |
| O. japonica.24 - O. adherens.18 == 0 2.14941 0.25810 8.328 < 2e-16 *** | | |
| O. puerilis.24 - O. adherens.18 == 0 0.21749 0.34060 0.639 0.547157 | | |
| O. hartmanni.24 - O. adherens.18 == 0 3.44440 0.34068 10.110 < 2e-16 *** | | |
| O. diadema.24 - O. adherens.18 == 0 0.87630 0.26731 3.278 0.001440 ** | | |
| O. robusta.24 - O. adherens.18 == 0 0.99200 0.25373 3.910 0.000133 *** | | |
| O. labronica.24 - O. puerilis.18 == 0 2.53184 0.30364 8.338 < 2e-16 *** | | |
| O. japonica.24 - O. puerilis.18 == 0 3.95122 0.27962 14.131 < 2e-16 *** | | |
| O. adherens.24 - O. puerilis.18 == 0 6.00181 0.34851 17.222 < 2e-16 *** | | |
| O. hartmanni.24 - O. puerilis.18 == 0 5.24621 0.26563 19.750 < 2e-16 *** | | |
| O. diadema.24 - O. puerilis.18 == 0 2.67811 0.30960 8.650 < 2e-16 *** | | |
| O. robusta.24 - O. puerilis.18 == 0 2.79381 0.28844 9.686 < 2e-16 *** | | |
| O. labronica.24 - O. hartmanni.18 == 0 0.60083 0.33618 1.787 0.083024 . | | |
| O. japonica.24 - O. hartmanni.18 == 0 2.02021 0.31185 6.478 1.92e-10 *** | | |
| O. adherens.24 - O. hartmanni.18 == 0 4.07080 0.38000 10.713 < 2e-16 *** | | |
| O. puerilis.24 - O. hartmanni.18 == 0 0.08829 0.25130 0.351 0.733399 | | |
| O. diadema.24 - O. hartmanni.18 == 0 0.74710 0.34074 2.193 0.033932 * | | |
| O. robusta.24 - O. hartmanni.18 == 0 0.86280 0.32084 2.689 0.009311 ** | | |
| O. labronica.24 - O. diadema.18 == 0 2.28765 0.24523 9.329 < 2e-16 *** | | |
| O. japonica.24 - O. diadema.18 == 0 3.70703 0.24442 15.167 < 2e-16 *** | | |
| O. adherens.24 - O. diadema.18 == 0 5.75762 0.27016 21.312 < 2e-16 *** | | |
| O. puerilis.24 - O. diadema.18 == 0 1.77511 0.29591 5.999 3.77e-09 *** | | |
| O. hartmanni.24 - O. diadema.18 == 0 5.00202 0.30509 16.395 < 2e-16 *** | | |
| O. robusta.24 - O. diadema.18 == 0 2.54962 0.24403 10.448 < 2e-16 *** | | |
| O. labronica.24 - O. robusta.18 == 0 1.42277 0.23011 6.183 1.22e-09 *** | | |
| O. japonica.24 - O. robusta.18 == 0 2.84215 0.22599 12.576 < 2e-16 *** | | |
| O. adherens.24 - O. robusta.18 == 0 4.89274 0.25998 18.820 < 2e-16 *** | | |
| O. puerilis.24 - O. robusta.18 == 0 0.91023 0.27005 3.371 0.001050 ** | | |
| O. hartmanni.24 - O. robusta.18 == 0 4.13714 0.28276 14.631 < 2e-16 *** | | |
| O. diadema.24 - O. robusta.18 == 0 1.56904 0.24604 6.377 3.64e-10 *** | | |
| **e) Chill coma** | | |
| **Estimate SE *t*-value *P-*value** | | |
| *Between acclimation temperatures within species* | | |
| O. labronica.24 - O. labronica.18 == 0 0.17375 0.18648 0.932 0.376280 | | |
| O. japonica.24 - O. japonica.18 == 0 0.58975 0.18615 3.168 0.001912 ** | | |
| O. adherens.24 - O. adherens.18 == 0 2.68667 0.21473 12.512 < 2e-16 *** | | |
| O. puerilis.24 - O. puerilis.18 == 0 0.77917 0.18619 4.185 4.26e-05 *** | | |
| O. hartmanni.24 - O. hartmanni.18 == 0 4.34885 0.23905 18.193 < 2e-16 *** | | |
| O. diadema.24 - O. diadema.18 == 0 1.33378 0.21496 6.205 9.97e-10 *** | | |
| O. robusta.24 - O. robusta.18 == 0 0.80950 0.18670 4.336 2.24e-05 *** | | |
| *Between species within acclimation temperature* | | |
| O. japonica.18 - O. labronica.18 == 0 -1.76117 0.19351 -9.101 < 2e-16 *** | | |
| O. adherens.18 - O. labronica.18 == 0 0.74150 0.20229 3.666 0.000340 *** | | |
| O. puerilis.18 - O. labronica.18 == 0 -2.69568 0.25938 -10.393 < 2e-16 *** | | |
| O. hartmanni.18 - O. labronica.18 == 0 -1.56225 0.28620 -5.459 7.53e-08 *** | | |
| O. diadema.18 - O. labronica.18 == 0 -1.82861 0.20369 -8.977 < 2e-16 *** | | |
| O. robusta.18 - O. labronica.18 == 0 -1.35850 0.19252 -7.056 3.53e-12 *** | | |
| O. adherens.18 - O. japonica.18 == 0 2.50267 0.21529 11.624 < 2e-16 *** | | |
| O. puerilis.18 - O. japonica.18 == 0 -0.93451 0.22537 -4.147 4.95e-05 *** | | |
| O. hartmanni.18 - O. japonica.18 == 0 0.19892 0.25178 0.790 0.449245 | | |
| O. diadema.18 - O. japonica.18 == 0 -0.06744 0.20183 -0.334 0.746457 | | |
| O. robusta.18 - O. japonica.18 == 0 0.40267 0.18600 2.165 0.034577 * | | |
| O. puerilis.18 - O. adherens.18 == 0 -3.43718 0.28686 -11.982 < 2e-16 *** | | |
| O. hartmanni.18 - O. adherens.18 == 0 -2.30375 0.31279 -7.365 3.92e-13 *** | | |
| O. diadema.18 - O. adherens.18 == 0 -2.57011 0.22238 -11.557 < 2e-16 *** | | |
| O. robusta.18 - O. adherens.18 == 0 -2.10000 0.21399 -9.813 < 2e-16 *** | | |
| O. hartmanni.18 - O. puerilis.18 == 0 1.13343 0.20580 5.507 5.81e-08 *** | | |
| O. diadema.18 - O. puerilis.18 == 0 0.86706 0.24890 3.484 0.000672 *** | | |
| O. robusta.18 - O. puerilis.18 == 0 1.33717 0.22747 5.878 6.98e-09 *** | | |
| O. diadema.18 - O. hartmanni.18 == 0 -0.26636 0.27441 -0.971 0.359360 | | |
| O. robusta.18 - O. hartmanni.18 == 0 0.20375 0.25394 0.802 0.446916 | | |
| O. robusta.18 - O. diadema.18 == 0 0.47011 0.20150 2.333 0.022919 * | | |
| O. japonica.24 - O. labronica.24 == 0 -1.34517 0.18859 -7.133 2.08e-12 *** | | |
| O. adherens.24 - O. labronica.24 == 0 3.25442 0.20439 15.922 < 2e-16 *** | | |
| O. puerilis.24 - O. labronica.24 == 0 -2.09026 0.24386 -8.571 < 2e-16 *** | | |
| O. hartmanni.24 - O. labronica.24 == 0 2.61285 0.24886 10.499 < 2e-16 *** | | |
| O. diadema.24 - O. labronica.24 == 0 -0.66858 0.20112 -3.324 0.001152 ** | | |
| O. robusta.24 - O. labronica.24 == 0 -0.72275 0.18697 -3.866 0.000160 *** | | |
| O. adherens.24 - O. japonica.24 == 0 4.59959 0.21245 21.651 < 2e-16 *** | | |
| O. puerilis.24 - O. japonica.24 == 0 -0.74509 0.22485 -3.314 0.001180 ** | | |
| O. hartmanni.24 - O. japonica.24 == 0 3.95802 0.23457 16.874 < 2e-16 *** | | |
| O. diadema.24 - O. japonica.24 == 0 0.67658 0.20198 3.350 0.001082 ** | | |
| O. robusta.24 - O. japonica.24 == 0 0.62242 0.18635 3.340 0.001105 ** | | |
| O. puerilis.24 - O. adherens.24 == 0 -5.34468 0.28035 -19.064 < 2e-16 *** | | |
| O. hartmanni.24 - O. adherens.24 == 0 -0.64157 0.28043 -2.288 0.025512 * | | |
| O. diadema.24 - O. adherens.24 == 0 -3.92300 0.22003 -17.830 < 2e-16 *** | | |
| O. robusta.24 - O. adherens.24 == 0 -3.97717 0.20885 -19.043 < 2e-16 *** | | |
| O. hartmanni.24 - O. puerilis.24 == 0 4.70311 0.21710 21.663 < 2e-16 *** | | |
| O. diadema.24 - O. puerilis.24 == 0 1.42168 0.24927 5.703 1.94e-08 *** | | |
| O. robusta.24 - O. puerilis.24 == 0 1.36751 0.23180 5.899 6.26e-09 *** | | |
| O. diadema.24 - O. hartmanni.24 == 0 -3.28144 0.25543 -12.847 < 2e-16 *** | | |
| O. robusta.24 - O. hartmanni.24 == 0 -3.33560 0.23965 -13.919 < 2e-16 *** | | |
| O. robusta.24 - O. diadema.24 == 0 -0.05417 0.20108 -0.269 0.787632 | | |
| *Among species and acclimation temperatures* | | |
| O. japonica.24 - O. labronica.18 == 0 -1.17142 0.19138 -6.121 1.63e-09 *** | | |
| O. adherens.24 - O. labronica.18 == 0 3.42817 0.20229 16.947 < 2e-16 *** | | |
| O. puerilis.24 - O. labronica.18 == 0 -1.91651 0.25304 -7.574 8.23e-14 *** | | |
| O. hartmanni.24 - O. labronica.18 == 0 2.78660 0.25613 10.880 < 2e-16 *** | | |
| O. diadema.24 - O. labronica.18 == 0 -0.49483 0.20229 -2.446 0.017064 * | | |
| O. robusta.24 - O. labronica.18 == 0 -0.54900 0.18891 -2.906 0.004499 ** | | |
| O. labronica.24 - O. japonica.18 == 0 1.93492 0.19015 10.176 < 2e-16 *** | | |
| O. adherens.24 - O. japonica.18 == 0 5.18934 0.21529 24.103 < 2e-16 *** | | |
| O. puerilis.24 - O. japonica.18 == 0 -0.15534 0.22029 -0.705 0.497093 | | |
| O. hartmanni.24 - O. japonica.18 == 0 4.54777 0.23135 19.657 < 2e-16 *** | | |
| O. diadema.24 - O. japonica.18 == 0 1.26634 0.20302 6.237 8.26e-10 *** | | |
| O. robusta.24 - O. japonica.18 == 0 1.21217 0.18707 6.480 1.82e-10 *** | | |
| O. labronica.24 - O. adherens.18 == 0 -0.56775 0.20439 -2.778 0.006642 ** | | |
| O. japonica.24 - O. adherens.18 == 0 -1.91292 0.21245 -9.004 < 2e-16 *** | | |
| O. puerilis.24 - O. adherens.18 == 0 -2.65801 0.28035 -9.481 < 2e-16 *** | | |
| O. hartmanni.24 - O. adherens.18 == 0 2.04510 0.28043 7.293 6.58e-13 *** | | |
| O. diadema.24 - O. adherens.18 == 0 -1.23634 0.22003 -5.619 3.12e-08 *** | | |
| O. robusta.24 - O. adherens.18 == 0 -1.29050 0.20885 -6.179 1.15e-09 *** | | |
| O. labronica.24 - O. puerilis.18 == 0 2.86943 0.24993 11.481 < 2e-16 *** | | |
| O. japonica.24 - O. puerilis.18 == 0 1.52426 0.23016 6.623 7.14e-11 *** | | |
| O. adherens.24 - O. puerilis.18 == 0 6.12385 0.28686 21.347 < 2e-16 *** | | |
| O. hartmanni.24 - O. puerilis.18 == 0 5.48228 0.21865 25.073 < 2e-16 *** | | |
| O. diadema.24 - O. puerilis.18 == 0 2.20084 0.25484 8.636 < 2e-16 *** | | |
| O. robusta.24 - O. puerilis.18 == 0 2.14668 0.23742 9.041 < 2e-16 *** | | |
| O. labronica.24 - O. hartmanni.18 == 0 1.73600 0.27672 6.273 6.69e-10 *** | | |
| O. japonica.24 - O. hartmanni.18 == 0 0.39083 0.25669 1.523 0.141905 | | |
| O. adherens.24 - O. hartmanni.18 == 0 4.99042 0.31279 15.955 < 2e-16 *** | | |
| O. puerilis.24 - O. hartmanni.18 == 0 -0.35426 0.20685 -1.713 0.097498 . | | |
| O. diadema.24 - O. hartmanni.18 == 0 1.06742 0.28048 3.806 0.000198 *** | | |
| O. robusta.24 - O. hartmanni.18 == 0 1.01325 0.26409 3.837 0.000177 *** | | |
| O. labronica.24 - O. diadema.18 == 0 2.00236 0.20186 9.920 < 2e-16 *** | | |
| O. japonica.24 - O. diadema.18 == 0 0.65719 0.20119 3.267 0.001376 ** | | |
| O. adherens.24 - O. diadema.18 == 0 5.25678 0.22238 23.639 < 2e-16 *** | | |
| O. puerilis.24 - O. diadema.18 == 0 -0.08790 0.24357 -0.361 0.734336 | | |
| O. hartmanni.24 - O. diadema.18 == 0 4.61522 0.25113 18.378 < 2e-16 *** | | |
| O. robusta.24 - O. diadema.18 == 0 1.27961 0.20086 6.371 3.65e-10 *** | | |
| O. labronica.24 - O. robusta.18 == 0 1.53225 0.18941 8.090 1.55e-15 *** | | |
| O. japonica.24 - O. robusta.18 == 0 0.18708 0.18602 1.006 0.344872 | | |
| O. adherens.24 - O. robusta.18 == 0 4.78667 0.21399 22.368 < 2e-16 *** | | |
| O. puerilis.24 - O. robusta.18 == 0 -0.55801 0.22229 -2.510 0.014444 * | | |
| O. hartmanni.24 - O. robusta.18 == 0 4.14511 0.23275 17.809 < 2e-16 *** | | |
| O. diadema.24 - O. robusta.18 == 0 0.86367 0.20252 4.265 3.04e-05 *** | | |

**Table S7.** Mean (± SE) upper (a-c) and lower (d-e) physiological thermal tolerance limits (CTmax and CTmin, respectively) of the studied species of the genus *Ophryotrocha* measured after 7 d of exposure to 18, 24, and 30 °C. n = sample size.

|  | **Acclimation temperature** | **18 °C** | | | **24 °C** | | | **30 °C** | | |
| --- | --- | --- | --- | --- | --- | --- | --- | --- | --- | --- |
| **CTmax** | **Species** | **n** | **Mean** | **SE** | **n** | **Mean** | **SE** | **n** | **Mean** | **SE** |
| **a) Loss of locomotion** | *O. labronica* | 20 | 34.12 | 0.19 | 20 | 35.63 | 0.20 | 20 | 38.29 | 0.11 |
| **control** | *O. japonica* | 20 | 32.25 | 0.24 | 20 | 35.55 | 0.22 | 20 | 35.97 | 0.16 |
| **(°C)** | *O. puerilis* | 20 | 27.67 | 0.12 | 20 | 30.85 | 0.21 | ─ | ─ | ─ |
|  | *O. hartmanni* | 14 | 26.38 | 0.20 | 12 | 29.57 | 0.09 | ─ | ─ | ─ |
|  | *O. robusta* | 20 | 29.95 | 0.18 | 20 | 32.79 | 0.14 | ─ | ─ | ─ |
|  | *O. adherens* | 15 | 26.77 | 0.21 | 15 | 32.03 | 0.11 | 15 | 34.34 | 0.14 |
|  | *O. diadema* | 15 | 31.27 | 0.24 | 15 | 33.37 | 0.14 | ─ | ─ | ─ |
| **b) Onset of spasms** | *O. labronica* | 20 | 37.54 | 0.20 | 20 | 38.37 | 0.13 | 20 | 39.75 | 0.14 |
| **(°C)** | *O. japonica* | 20 | 36.81 | 0.13 | 20 | 37.72 | 0.21 | 20 | 38.18 | 0.14 |
|  | *O. puerilis* | 20 | 30.27 | 0.15 | 20 | 32.21 | 0.14 | ─ | ─ | ─ |
|  | *O. hartmanni* | 14 | 30.21 | 0.14 | 12 | 31.20 | 0.16 | ─ | ─ | ─ |
|  | *O. robusta* | 20 | 32.13 | 0.12 | 20 | 34.34 | 0.07 | ─ | ─ | ─ |
|  | *O. adherens* | 15 | 34.84 | 0.12 | 15 | 34.85 | 0.22 | 15 | 36.11 | 0.14 |
|  | *O. diadema* | 15 | 34.20 | 0.16 | 15 | 35.12 | 0.10 | ─ | ─ | ─ |
| **c) Lethal** | *O. labronica* | 20 | 41.75 | 0.13 | 20 | 42.30 | 0.12 | 20 | 42.66 | 0.13 |
| **temperature** | *O. japonica* | 20 | 40.67 | 0.06 | 20 | 41.32 | 0.18 | 20 | 41.62 | 0.07 |
| **(°C)** | *O. puerilis* | 20 | 33.76 | 0.12 | 20 | 34.25 | 0.15 | ─ | ─ | ─ |
|  | *O. hartmanni* | 14 | 33.76 | 0.05 | 12 | 34.18 | 0.17 | ─ | ─ | ─ |
|  | *O. robusta* | 20 | 36.55 | 0.18 | 20 | 36.79 | 0.16 | ─ | ─ | ─ |
|  | *O. adherens* | 15 | 37.27 | 0.10 | 15 | 37.63 | 0.15 | 15 | 38.24 | 0.14 |
|  | *O. diadema* | 15 | 38.98 | 0.21 | 15 | 38.25 | 0.15 | ─ | ─ | ─ |
| **CTmin** | **Species** | **n** | **Mean** | **SE** | **n** | **Mean** | **SE** | **n** | **Mean** | **SE** |
| **d) Onset of spasms** | *O. labronica* | 20 | 6.15 | 0.17 | 20 | 7.38 | 0.07 | 20 | 11.37 | 0.16 |
| **(°C)** | *O. japonica* | 20 | 5.46 | 0.11 | 20 | 8.78 | 0.09 | 20 | 10.01 | 0.18 |
|  | *O. puerilis* | 20 | 4.75 | 0.19 | 20 | 6.77 | 0.24 | ─ | ─ | ─ |
|  | *O. hartmanni* | 14 | 6.66 | 0.23 | 12 | 10.02 | 0.21 | ─ | ─ | ─ |
|  | *O. robusta* | 20 | 5.94 | 0.15 | 20 | 7.63 | 0.10 | ─ | ─ | ─ |
|  | *O. adherens* | 15 | 6.67 | 0.13 | 15 | 10.87 | 0.30 | 15 | 12.45 | 0.23 |
|  | *O. diadema* | 15 | 5.08 | 0.22 | 15 | 7.52 | 0.11 | ─ | ─ | ─ |
| **e) Chill coma** | *O. labronica* | 20 | -0.79 | 0.07 | 20 | -0.63 | 0.11 | 20 | 1.80 | 0.13 |
| **(°C)** | *O. japonica* | 20 | -2.59 | 0.11 | 20 | -1.99 | 0.14 | 20 | -0.63 | 0.23 |
|  | *O. puerilis* | 20 | -3.60 | 0.12 | 20 | -2.82 | 0.08 | ─ | ─ | ─ |
|  | *O. hartmanni* | 14 | -2.48 | 0.08 | 12 | 1.91 | 0.29 | ─ | ─ | ─ |
|  | *O. robusta* | 20 | -2.18 | 0.06 | 20 | -1.36 | 0.17 | ─ | ─ | ─ |
|  | *O. adherens* | 15 | -0.03 | 0.13 | 15 | 2.65 | 0.30 | 15 | 3.05 | 0.11 |
|  | *O. diadema* | 15 | -2.64 | 0.13 | 15 | -1.30 | 0.13 | ─ | ─ | ─ |

**Table S8.** Results of multiple pair-wise comparisons using Tukey’s test for upper (a-c) and lower (d-e) physiological thermal tolerance limits (CTmax and CTmin, respectively) between studied species of the genus *Ophryotrocha* that survived the exposure to 18, 24, and 30 °C. Estimate, standard error (SE), *t*-value, and *P*-value (significance level; *P* = 0.05) adjusted with Benjamini-Hochberg correction are provided

| **CTmax** | | | | |
| --- | --- | --- | --- | --- |
| **a) Loss of locomotion control** | | | | |
| **Estimate SE *t*-value *P-*value** | | | | |
| *Between species within acclimation temperature* | | | | |
| O. japonica.18 - O. labronica.18 == 0 -1.73578 0.28727 -6.042 2.10e-09 *** | | | | |
| O. adherens.18 - O. labronica.18 == 0 -7.41076 0.27822 -26.636 < 2e-16 *** | | | | |
| O. adherens.18 - O. japonica.18 == 0 -5.67499 0.33249 -17.068 < 2e-16 *** | | | | |
| O. japonica.24 - O. labronica.24 == 0 0.01599 0.26749 0.060 0.952 | | | | |
| O. adherens.24 - O. labronica.24 == 0 -3.66437 0.28289 -12.953 < 2e-16 *** | | | | |
| O. adherens.24 - O. japonica.24 == 0 -3.68036 0.31714 -11.605 < 2e-16 *** | | | | |
| O. japonica.30 - O. labronica.30 == 0 -2.20465 0.27867 -7.911 4.00e-15 *** | | | | |
| O. adherens.30 - O. labronica.30 == 0 -3.97646 0.27494 -14.463 < 2e-16 *** | | | | |
| O. adherens.30 - O. japonica.30 == 0 -1.77181 0.31117 -5.694 1.60e-08 *** | | | | |
| *Between acclimation temperatures within species* | | | | |
| O. labronica.24 - O. labronica.18 == 0 1.53146 0.25483 6.010 2.48e-09 *** | | | | |
| O. labronica.30 - O. labronica.18 == 0 4.18097 0.25371 16.479 < 2e-16 *** | | | | |
| O. labronica.30 - O. labronica.24 == 0 2.64951 0.25304 10.471 < 2e-16 *** | | | | |
| O. japonica.24 - O. japonica.18 == 0 3.28322 0.25339 12.957 < 2e-16 *** | | | | |
| O. japonica.30 - O. japonica.18 == 0 3.71210 0.25282 14.683 < 2e-16 *** | | | | |
| O. japonica.30 - O. japonica.24 == 0 0.42888 0.25354 1.692 0.102 | | | | |
| O. adherens.24 - O. adherens.18 == 0 5.27785 0.29215 18.066 < 2e-16 *** | | | | |
| O. adherens.30 - O. adherens.18 == 0 7.61528 0.29502 25.813 < 2e-16 *** | | | | |
| O. adherens.30 - O. adherens.24 == 0 2.33743 0.29359 7.961 3.05e-15 *** | | | | |
| *Among species and acclimation temperatures* | | | | |
| O. japonica.24 - O. labronica.18 == 0 1.54745 0.27957 5.535 3.86e-08 *** | | | | |
| O. adherens.24 - O. labronica.18 == 0 -2.13291 0.27627 -7.720 1.81e-14 *** | | | | |
| O. japonica.30 - O. labronica.18 == 0 1.97632 0.28829 6.855 1.07e-11 *** | | | | |
| O. adherens.30 - O. labronica.18 == 0 0.20451 0.27328 0.748 0.467 | | | | |
| O. labronica.24 - O. japonica.18 == 0 3.26724 0.27354 11.944 < 2e-16 *** | | | | |
| O. adherens.24 - O. japonica.18 == 0 -0.39714 0.32614 -1.218 0.236 | | | | |
| O. labronica.30 - O. japonica.18 == 0 5.91675 0.27778 21.300 < 2e-16 *** | | | | |
| O. adherens.30 - O. japonica.18 == 0 1.94029 0.31016 6.256 5.69e-10 *** | | | | |
| O. labronica.24 - O. adherens.18 == 0 8.94222 0.28607 31.259 < 2e-16 *** | | | | |
| O. japonica.24 - O. adherens.18 == 0 8.95821 0.32307 27.728 < 2e-16 *** | | | | |
| O. labronica.30 - O. adherens.18 == 0 11.59174 0.28308 40.949 < 2e-16 *** | | | | |
| O. japonica.30 - O. adherens.18 == 0 9.38708 0.33371 28.129 < 2e-16 *** | | | | |
| O. japonica.30 - O. labronica.24 == 0 0.44486 0.27436 1.621 0.114 | | | | |
| O. adherens.30 - O. labronica.24 == 0 -1.32694 0.27638 -4.801 1.89e-06 *** | | | | |
| O. labronica.30 - O. japonica.24 == 0 2.63353 0.27116 9.712 < 2e-16 *** | | | | |
| O. adherens.30 - O. japonica.24 == 0 -1.34293 0.30244 -4.440 1.04e-05 *** | | | | |
| O. labronica.30 - O. adherens.24 == 0 6.31388 0.28030 22.526 < 2e-16 *** | | | | |
| O. japonica.30 - O. adherens.24 == 0 4.10923 0.32731 12.554 < 2e-16 *** | | | | |
| **b) Onset of spasms** | | | | |
| **Estimate SE *t*-value *P-*value** | | | | |
| *Between species within acclimation temperature* | | | | |
| O. japonica.18 - O. labronica.18 == 0 -0.77943 0.25177 -3.096 0.002436 ** | | | | |
| O. adherens.18 - O. labronica.18 == 0 -2.67374 0.24384 -10.965 < 2e-16 *** | | | | |
| O. adherens.18 - O. japonica.18 == 0 -1.89430 0.29141 -6.501 1.44e-10 *** | | | | |
| O. japonica.24 - O. labronica.24 == 0 -0.68487 0.23444 -2.921 0.004182 ** | | | | |
| O. adherens.24 - O. labronica.24 == 0 -3.48885 0.24793 -14.072 < 2e-16 *** | | | | |
| O. adherens.24 - O. japonica.24 == 0 -2.80397 0.27795 -10.088 < 2e-16 *** | | | | |
| O. japonica.30 - O. labronica.30 == 0 -1.61678 0.24424 -6.620 6.82e-11 *** | | | | |
| O. adherens.30 - O. labronica.30 == 0 -3.63057 0.24096 -15.067 < 2e-16 *** | | | | |
| O. adherens.30 - O. japonica.30 == 0 -2.01380 0.27272 -7.384 3.45e-13 *** | | | | |
| *Between acclimation temperatures within species* | | | | |
| O. labronica.24 - O. labronica.18 == 0 0.81724 0.22334 3.659 0.000325 *** | | | | |
| O. labronica.30 - O. labronica.18 == 0 2.20649 0.22236 9.923 < 2e-16 *** | | | | |
| O. labronica.30 - O. labronica.24 == 0 1.38925 0.22177 6.264 6.42e-10 *** | | | | |
| O. japonica.24 - O. japonica.18 == 0 0.91180 0.22208 4.106 5.37e-05 *** | | | | |
| O. japonica.30 - O. japonica.18 == 0 1.36915 0.22158 6.179 1.06e-09 *** | | | | |
| O. japonica.30 - O. japonica.24 == 0 0.45735 0.22221 2.058 0.043173 * | | | | |
| O. adherens.24 - O. adherens.18 == 0 0.00213 0.25605 0.008 0.993361 | | | | |
| O. adherens.30 - O. adherens.18 == 0 1.24966 0.25856 4.833 1.86e-06 *** | | | | |
| O. adherens.30 - O. adherens.24 == 0 1.24752 0.25731 4.848 1.79e-06 *** | | | | |
| *Among species and acclimation temperatures* | | | | |
| O. japonica.24 - O. labronica.18 == 0 0.13237 0.24503 0.540 0.605873 | | | | |
| O. adherens.24 - O. labronica.18 == 0 -2.67161 0.24213 -11.034 < 2e-16 *** | | | | |
| O. japonica.30 - O. labronica.18 == 0 0.58971 0.25266 2.334 0.022045 * | | | | |
| O. adherens.30 - O. labronica.18 == 0 -1.42408 0.23951 -5.946 4.31e-09 *** | | | | |
| O. labronica.24 - O. japonica.18 == 0 1.59668 0.23974 6.660 5.79e-11 *** | | | | |
| O. adherens.24 - O. japonica.18 == 0 -1.89217 0.28584 -6.620 6.82e-11 *** | | | | |
| O. labronica.30 - O. japonica.18 == 0 2.98593 0.24346 12.265 < 2e-16 *** | | | | |
| O. adherens.30 - O. japonica.18 == 0 -0.64465 0.27183 -2.372 0.020573 * | | | | |
| O. labronica.24 - O. adherens.18 == 0 3.49098 0.25072 13.924 < 2e-16 *** | | | | |
| O. japonica.24 - O. adherens.18 == 0 2.80611 0.28315 9.910 < 2e-16 *** | | | | |
| O. labronica.30 - O. adherens.18 == 0 4.88023 0.24810 19.671 < 2e-16 *** | | | | |
| O. japonica.30 - O. adherens.18 == 0 3.26345 0.29248 11.158 < 2e-16 *** | | | | |
| O. japonica.30 - O. labronica.24 == 0 -0.22753 0.24046 -0.946 0.364266 | | | | |
| O. adherens.30 - O. labronica.24 == 0 -2.24132 0.24223 -9.253 < 2e-16 *** | | | | |
| O. labronica.30 - O. japonica.24 == 0 2.07412 0.23765 8.728 < 2e-16 *** | | | | |
| O. adherens.30 - O. japonica.24 == 0 -1.55645 0.26507 -5.872 6.46e-09 *** | | | | |
| O. labronica.30 - O. adherens.24 == 0 4.87810 0.24566 19.857 < 2e-16 *** | | | | |
| O. japonica.30 - O. adherens.24 == 0 3.26132 0.28687 11.369 < 2e-16 *** | | | | |
| **c) Lethal temperature** | | | | |
| **Estimate SE *t*-value *P-*value** | | | | |
| *Between species* | | | | |
| O. japonica - O. labronica == 0 -1.1920 0.1498 -7.956 1.78e-15 *** | | | | |
| O. adherens - O. labronica == 0 -4.4492 0.1355 -32.826 < 2e-16 *** | | | | |
| O. adherens - O. japonica == 0 -3.2572 0.1852 -17.589 < 2e-16 ** |  |  |  |  |
| *Between acclimation temperatures* | | | | |
| 24 - 18 == 0 0.4716 0.3410 1.383 0.2500 | | | | |
| 30 - 18 == 0 0.7862 0.3420 2.298 0.0646 . | | | | |
| 30 - 24 == 0 0.3146 0.3412 0.922 0.3565 | | | | |
| **CTmin** | | | | |
| **d) Onset of spasms** | | | | |
| **Estimate SE *t*-value *P-*value** | | | | |
| *Between species within acclimation temperature* | | | | |
| O. japonica.18 - O. labronica.18 == 0 -0.4264 0.2431 -1.754 0.081680 . | | | | |
| O. adherens.18 - O. labronica.18 == 0 0.4029 0.2394 1.683 0.092384 . | | | | |
| O. adherens.18 - O. japonica.18 == 0 0.8293 0.2831 2.930 0.003818 ** | | | | |
| O. japonica.24 - O. labronica.24 == 0 1.5575 0.2263 6.884 8.75e-12 *** | | | | |
| O. adherens.24 - O. labronica.24 == 0 3.3035 0.2468 13.385 < 2e-16 *** | | | | |
| O. adherens.24 - O. japonica.24 == 0 1.7460 0.2739 6.375 2.54e-10 *** | | | | |
| O. japonica.30 - O. labronica.30 == 0 -1.0725 0.2457 -4.365 1.52e-05 *** | | | | |
| O. adherens.30 - O. labronica.30 == 0 1.1146 0.2346 4.752 2.50e-06 *** | | | | |
| O. adherens.30 - O. japonica.30 == 0 2.1871 0.2566 8.523 < 2e-16 *** | | | | |
| *Between acclimation temperatures within species* | | | | |
| O. labronica.24 - O. labronica.18 == 0 1.2995 0.2188 5.940 3.81e-09 *** | | | | |
| O. japonica.24 - O. japonica.18 == 0 3.2833 0.2176 15.089 < 2e-16 *** | | | | |
| O. adherens.30 - O. adherens.18 == 0 5.8664 0.2530 23.191 < 2e-16 *** | | | | |
| O. labronica.30 - O. labronica.18 == 0 5.1548 0.2183 23.611 < 2e-16 *** | | | | |
| O. japonica.30 - O. japonica.18 == 0 4.5087 0.2178 20.706 < 2e-16 *** | | | | |
| O. adherens.24 - O. adherens.18 == 0 4.2000 0.2505 16.767 < 2e-16 *** | | | | |
| O. labronica.30 - O. labronica.24 == 0 3.8553 0.2233 17.265 < 2e-16 *** | | | | |
| O. japonica.30 - O. japonica.24 == 0 1.2254 0.2169 5.648 2.08e-08 *** | | | | |
| O. adherens.30 - O. adherens.24 == 0 1.6664 0.2530 6.588 6.43e-11 *** | | | | |
| *Among species and acclimation temperatures* | | | | |
| O. japonica.24 - O. labronica.18 == 0 2.8569 0.2359 12.111 < 2e-16 *** | | | | |
| O. adherens.24 - O. labronica.18 == 0 4.6029 0.2394 19.226 < 2e-16 *** | | | | |
| O. japonica.30 - O. labronica.18 == 0 4.0823 0.2352 17.360 < 2e-16 *** | | | | |
| O. adherens.30 - O. labronica.18 == 0 6.2694 0.2347 26.710 < 2e-16 *** | | | | |
| O. labronica.24 - O. japonica.18 == 0 1.7259 0.2317 7.450 1.46e-13 *** | | | | |
| O. adherens.24 - O. japonica.18 == 0 5.0293 0.2831 17.766 < 2e-16 *** | | | | |
| O. labronica.30 - O. japonica.18 == 0 5.5812 0.2551 21.877 < 2e-16 *** | | | | |
| O. adherens.30 - O. japonica.18 == 0 6.6958 0.2649 25.278 < 2e-16 *** | | | | |
| O. labronica.24 - O. adherens.18 == 0 0.8965 0.2468 3.633 0.000326 *** | | | | |
| O. japonica.24 - O. adherens.18 == 0 2.4540 0.2739 8.960 < 2e-16 *** | | | | |
| O. labronica.30 - O. adherens.18 == 0 4.7519 0.2356 20.170 < 2e-16 *** | | | | |
| O. japonica.30 - O. adherens.18 == 0 3.6794 0.2729 13.482 < 2e-16 *** | | | | |
| O. japonica.30 - O. labronica.24 == 0 2.7828 0.2257 12.328 < 2e-16 *** | | | | |
| O. adherens.30 - O. labronica.24 == 0 4.9699 0.2381 20.874 < 2e-16 *** | | | | |
| O. labronica.30 - O. japonica.24 == 0 2.2979 0.2466 9.319 < 2e-16 *** | | | | |
| O. adherens.30 - O. japonica.24 == 0 3.4124 0.2574 13.258 < 2e-16 *** | | | | |
| O. labronica.30 - O. adherens.24 == 0 0.5519 0.2356 2.342 0.020900 * | | | | |
| O. japonica.30 - O. adherens.24 == 0 -0.5206 0.2729 -1.908 0.059759 . | | | | |
| **e) Chill coma** | | | | |
| **Estimate SE *t*-value *P-*value** | | | | |
| *Between species within acclimation temperature* | | | | |
| O. japonica.18 - O. labronica.18 == 0 -1.3817 0.2249 -6.143 1.26e-09 *** | | | | |
| O. adherens.18 - O. labronica.18 == 0 0.5714 0.2215 2.580 0.011872 * | | | | |
| O. adherens.18 - O. japonica.18 == 0 1.9531 0.2619 7.457 1.52e-13 *** | | | | |
| O. japonica.24 - O. labronica.24 == 0 -1.1227 0.2093 -5.363 1.13e-07 *** | | | | |
| O. adherens.24 - O. labronica.24 == 0 2.9862 0.2284 13.077 < 2e-16 *** | | | | |
| O. adherens.24 - O. japonica.24 == 0 4.1089 0.2534 16.214 < 2e-16 *** | | | | |
| O. japonica.30 - O. labronica.30 == 0 -1.9904 0.2273 -8.755 < 2e-16 *** | | | | |
| O. adherens.30 - O. labronica.30 == 0 1.2937 0.2170 5.961 3.76e-09 *** | | | | |
| O. adherens.30 - O. japonica.30 == 0 3.2841 0.2374 13.832 < 2e-16 *** | | | | |
| *Between acclimation temperatures within species* | | | | |
| O. labronica.24 - O. labronica.18 == 0 0.2719 0.2024 1.343 0.195527 | | | | |
| O. labronica.30 - O. labronica.18 == 0 2.4974 0.2020 12.363 < 2e-16 *** | | | | |
| O. labronica.30 - O. labronica.24 == 0 2.2255 0.2066 10.772 < 2e-16 *** | | | | |
| O. japonica.30 - O. japonica.18 == 0 1.8887 0.2015 9.375 < 2e-16 *** | | | | |
| O. japonica.24 - O. japonica.18 == 0 0.5309 0.2013 2.637 0.010389 * | | | | |
| O. japonica.30 - O. japonica.24 == 0 1.3579 0.2007 6.765 2.18e-11 *** | | | | |
| O. adherens.24 - O. adherens.18 == 0 2.6867 0.2318 11.592 < 2e-16 *** | | | | |
| O. adherens.30 - O. adherens.24 == 0 0.5330 0.2341 2.277 0.025617 * | | | | |
| O. adherens.30 - O. adherens.18 == 0 3.2197 0.2341 13.756 < 2e-16 *** | | | | |
| *Among species and acclimation temperatures* | | | | |
| O. japonica.24 - O. labronica.18 == 0 -0.8509 0.2183 -3.898 0.000129 *** | | | | |
| O. adherens.24 - O. labronica.18 == 0 3.2581 0.2215 14.708 < 2e-16 *** | | | | |
| O. japonica.30 - O. labronica.18 == 0 0.5070 0.2176 2.330 0.022985 * | | | | |
| O. adherens.30 - O. labronica.18 == 0 3.7911 0.2172 17.456 < 2e-16 *** | | | | |
| O. labronica.24 - O. japonica.18 == 0 1.6536 0.2144 7.714 2.20e-14 *** | | | | |
| O. adherens.24 - O. japonica.18 == 0 4.6398 0.2619 17.715 < 2e-16 *** | | | | |
| O. labronica.30 - O. japonica.18 == 0 3.8791 0.2361 16.434 < 2e-16 *** | | | | |
| O. adherens.30 - O. japonica.18 == 0 5.1728 0.2451 21.106 < 2e-16 *** | | | | |
| O. labronica.24 - O. adherens.18 == 0 -0.2995 0.2284 -1.312 0.200781 | | | | |
| O. japonica.24 - O. adherens.18 == 0 -1.4223 0.2534 -5.612 2.87e-08 *** | | | | |
| O. labronica.30 - O. adherens.18 == 0 1.9260 0.2180 8.835 < 2e-16 *** | | | | |
| O. japonica.30 - O. adherens.18 == 0 -0.0644 0.2525 -0.255 0.798700 | | | | |
| O. japonica.30 - O. labronica.24 == 0 0.2351 0.2089 1.126 0.267676 | | | | |
| O. adherens.30 - O. labronica.24 == 0 3.5192 0.2203 15.975 < 2e-16 *** | | | | |
| O. labronica.30 - O. japonica.24 == 0 3.3482 0.2281 14.675 < 2e-16 *** | | | | |
| O. adherens.30 - O. japonica.24 == 0 4.6419 0.2382 19.492 < 2e-16 *** | | | | |
| O. labronica.30 - O. adherens.24 == 0 -0.7607 0.2180 -3.490 0.000622 *** | | | | |
| O. japonica.30 - O. adherens.24 == 0 -2.7511 0.2525 -10.895 < 2e-16 *** | | | | |

**Table S9.** Mean (± SE) a) survival and b) total fecundity of the studied species of the genus *Ophryotrocha* measured during 90 d of exposure to 18, 24, and 30 °C. n = sample size

|  | **Acclimation temperature** | **18 °C** | | | **24 °C** | | | **30 °C** | | |
| --- | --- | --- | --- | --- | --- | --- | --- | --- | --- | --- |
| **Trait** | **Species** | **n** | **Mean** | **SE** | **n** | **Mean** | **SE** | **n** | **Mean** | **SE** |
| **a) Survival** | *O. labronica* | 10 | 76.78 | 6.41 | 11 | 72.12 | 7.08 | 11 | 97.89 | 1.77 |
| **(%)** | *O. japonica* | 10 | 100.00 | 0.00 | 11 | 100 | 0.00 | 10 | 100 | 0.00 |
|  | *O. robusta* | 11 | 100.00 | 0.00 | 10 | 86.44 | 9.08 | 10 | 14.67 | 2.35 |
|  | *O. adherens* | 17 | 96.47 | 2.17 | 16 | 49.79 | 2.28 | 21 | 11.32 | 1.53 |
|  | *O. diadema* | 22 | 96.31 | 2.07 | 22 | 94.85 | 2.38 | 22 | 13.03 | 1.42 |
| **b) Total fecundity** | *O. labronica* | 10 | 17.90 | 3.31 | 10 | 45.77 | 5.26 | 10 | 40.78 | 6.75 |
| **(# eggs chaetigers-1)** | *O. japonica* | 10 | 9.80 | 1.74 | 10 | 34.08 | 4.68 | 10 | 27.79 | 2.96 |
|  | *O. robusta* | 11 | 60.39 | 3.93 | 11 | 67.57 | 10.16 | 11 | 0.00 | 0.00 |
|  | *O. adherens* | 17 | 23.31 | 2.56 | 17 | 35.46 | 2.14 | 17 | 0.56 | 0.20 |
|  | *O. diadema* | 22 | 13.70 | 1.03 | 22 | 25.36 | 1.96 | 22 | 0.00 | 0.00 |

**Table S10.** Results of multiple pair-wise comparisons using Tukey’s test for a) survival and b) total fecundity between species of the genus *Ophryotrocha* exposed for 90 d to 18, 24, and 30 °C. Estimate, standard error (SE), *t*-value, and *P*-value (significance level *P* = 0.05) adjusted with Benjamini-Hochberg correction are provided

| **a) Survival** | |
| --- | --- |
| **Estimate SE *t*-value *P-*value** | |
| *Between species within acclimation temperature* | |
| O. japonica.18 - O. labronica.18 == 0 2.642e-01 7.560e-02 3.495 0.000843 *** | |
| O. adherens.18 - O. labronica.18 == 0 2.283e-01 6.890e-02 3.314 0.001585 ** | |
| O. diadema.18 - O. labronica.18 == 0 2.267e-01 6.637e-02 3.415 0.001114 ** | |
| O. robusta.18 - O. labronica.18 == 0 2.642e-01 7.410e-02 3.566 0.000667 *** | |
| O. adherens.18 - O. japonica.18 == 0 -3.593e-02 6.322e-02 -0.568 0.672188 | |
| O. diadema.18 - O. japonica.18 == 0 -3.756e-02 6.045e-02 -0.621 0.660099 | |
| O. robusta.18 - O. japonica.18 == 0 -9.992e-16 6.884e-02 0.000 1.000000 | |
| O. diadema.18 - O. adherens.18 == 0 -1.628e-03 5.182e-02 -0.031 1.000000 | |
| O. robusta.18 - O. adherens.18 == 0 3.593e-02 6.140e-02 0.585 0.672188 | |
| O. robusta.18 - O. diadema.18 == 0 3.756e-02 5.855e-02 0.641 0.659363 | |
| O. japonica.24 - O. labronica.24 == 0 3.268e-01 7.339e-02 4.453 1.81e-05 *** | |
| O. adherens.24 - O. labronica.24 == 0 -3.705e-01 7.903e-02 -4.688 6.16e-06 *** | |
| O. diadema.24 - O. labronica.24 == 0 2.739e-01 6.572e-02 4.168 5.96e-05 *** | |
| O. robusta.24 - O. labronica.24 == 0 1.812e-01 7.747e-02 2.339 0.031740 * | |
| O. adherens.24 - O. japonica.24 == 0 -6.973e-01 7.330e-02 -9.513 < 2e-16 *** | |
| O. diadema.24 - O. japonica.24 == 0 -5.289e-02 5.871e-02 -0.901 0.501284 | |
| O. robusta.24 - O. japonica.24 == 0 -1.457e-01 7.161e-02 -2.034 0.066743 . | |
| O. diadema.24 - O. adherens.24 == 0 6.444e-01 6.562e-02 9.821 < 2e-16 *** | |
| O. robusta.24 - O. adherens.24 == 0 5.517e-01 7.738e-02 7.129 2.35e-12 *** | |
| O. robusta.24 - O. diadema.24 == 0 -9.277e-02 6.373e-02 -1.456 0.206429 | |
| O. japonica.30 - O. labronica.30 == 0 2.134e-02 7.084e-02 0.301 0.834835 | |
| O. adherens.30 - O. labronica.30 == 0 -2.157e+00 1.139e-01 -18.936 < 2e-16 *** | |
| O. diadema.30 - O. labronica.30 == 0 -2.017e+00 1.058e-01 -19.058 < 2e-16 *** | |
| O. robusta.30 - O. labronica.30 == 0 -1.898e+00 1.395e-01 -13.607 < 2e-16 *** | |
| O. adherens.30 - O. japonica.30 == 0 -2.178e+00 1.137e-01 -19.163 < 2e-16 *** | |
| O. diadema.30 - O. japonica.30 == 0 -2.038e+00 1.056e-01 -19.306 < 2e-16 *** | |
| O. robusta.30 - O. japonica.30 == 0 -1.920e+00 1.393e-01 -13.779 < 2e-16 *** | |
| O. diadema.30 - O. adherens.30 == 0 1.404e-01 1.382e-01 1.016 0.433414 | |
| O. robusta.30 - O. adherens.30 == 0 2.588e-01 1.654e-01 1.565 0.171633 | |
| O. robusta.30 - O. diadema.30 == 0 1.184e-01 1.599e-01 0.740 0.595302 | |
| *Between acclimation temperatures within species* | |
| O. labronica.24 - O. labronica.18 == 0 -6.260e-02 7.977e-02 -0.785 0.567750 | |
| O. labronica.30 - O. labronica.18 == 0 2.429e-01 7.596e-02 3.198 0.002344 ** | |
| O. labronica.30 - O. labronica.24 == 0 3.055e-01 7.527e-02 4.059 9.41e-05 *** | |
| O. japonica.24 - O. japonica.18 == 0 -2.054e-15 6.884e-02 0.000 1.000000 | |
| O. japonica.30 - O. japonica.18 == 0 1.166e-15 7.046e-02 0.000 1.000000 | |
| O. japonica.30 - O. japonica.24 == 0 3.220e-15 6.884e-02 0.000 1.000000 | |
| O. adherens.24 - O. adherens.18 == 0 -6.614e-01 6.804e-02 -9.720 < 2e-16 *** | |
| O. adherens.30 - O. adherens.18 == 0 -2.142e+00 1.093e-01 -19.595 < 2e-16 *** | |
| O. adherens.30 - O. adherens.24 == 0 -1.481e+00 1.164e-01 -12.720 < 2e-16 *** | |
| O. diadema.24 - O. diadema.18 == 0 -1.533e-02 4.859e-02 -0.316 0.834835 | |
| O. diadema.30 - O. diadema.18 == 0 -2.000e+00 9.915e-02 -20.174 < 2e-16 *** | |
| O. diadema.30 - O. diadema.24 == 0 -1.985e+00 9.924e-02 -20.001 < 2e-16 *** | |
| O. robusta.24 - O. robusta.18 == 0 -1.457e-01 7.161e-02 -2.034 0.066743 . | |
| O. robusta.30 - O. robusta.18 == 0 -1.920e+00 1.385e-01 -13.860 < 2e-16 *** | |
| O. robusta.30 - O. robusta.24 == 0 -1.774e+00 1.407e-01 -12.608 < 2e-16 *** | |
| *Among species and acclimation temperatures* | |
| O. japonica.24 - O. labronica.18 == 0 2.642e-01 7.410e-02 3.566 0.000667 *** | |
| O. adherens.24 - O. labronica.18 == 0 -4.331e-01 7.968e-02 -5.435 1.25e-07 *** | |
| O. diadema.24 - O. labronica.18 == 0 2.113e-01 6.651e-02 3.178 0.002473 ** | |
| O. robusta.24 - O. labronica.18 == 0 1.186e-01 7.813e-02 1.518 0.185714 | |
| O. japonica.30 - O. labronica.18 == 0 2.642e-01 7.560e-02 3.495 0.000843 *** | |
| O. adherens.30 - O. labronica.18 == 0 -1.914e+00 1.169e-01 -16.369 < 2e-16 *** | |
| O. diadema.30 - O. labronica.18 == 0 -1.774e+00 1.091e-01 -16.264 < 2e-16 *** | |
| O. robusta.30 - O. labronica.18 == 0 -1.655e+00 1.420e-01 -11.659 < 2e-16 *** | |
| O. labronica.24 - O. japonica.18 == 0 -3.268e-01 7.491e-02 -4.363 2.59e-05 *** | |
| O. adherens.24 - O. japonica.18 == 0 -6.973e-01 7.482e-02 -9.320 < 2e-16 *** | |
| O. diadema.24 - O. japonica.18 == 0 -5.289e-02 6.060e-02 -0.873 0.508720 | |
| O. robusta.24 - O. japonica.18 == 0 -1.457e-01 7.317e-02 -1.991 0.071830 . | |
| O. labronica.30 - O. japonica.18 == 0 -2.134e-02 7.084e-02 -0.301 0.834835 | |
| O. adherens.30 - O. japonica.18 == 0 -2.178e+00 1.137e-01 -19.163 < 2e-16 *** | |
| O. diadema.30 - O. japonica.18 == 0 -2.038e+00 1.056e-01 -19.306 < 2e-16 *** | |
| O. robusta.30 - O. japonica.18 == 0 -1.920e+00 1.393e-01 -13.779 < 2e-16 *** | |
| O. labronica.24 - O. adherens.18 == 0 -2.909e-01 6.814e-02 -4.269 3.88e-05 *** | |
| O. japonica.24 - O. adherens.18 == 0 3.593e-02 6.140e-02 0.585 0.672188 | |
| O. diadema.24 - O. adherens.18 == 0 -1.696e-02 5.199e-02 -0.326 0.834835 | |
| O. robusta.24 - O. adherens.18 == 0 -1.097e-01 6.622e-02 -1.657 0.144225 | |
| O. labronica.30 - O. adherens.18 == 0 1.460e-02 6.364e-02 0.229 0.877058 | |
| O. japonica.30 - O. adherens.18 == 0 3.593e-02 6.322e-02 0.568 0.672188 | |
| O. diadema.30 - O. adherens.18 == 0 -2.002e+00 1.009e-01 -19.848 < 2e-16 *** | |
| O. robusta.30 - O. adherens.18 == 0 -1.884e+00 1.358e-01 -13.872 < 2e-16 *** | |
| O. labronica.24 - O. diadema.18 == 0 -2.893e-01 6.558e-02 -4.411 2.16e-05 *** | |
| O. japonica.24 - O. diadema.18 == 0 3.756e-02 5.855e-02 0.641 0.659363 | |
| O. adherens.24 - O. diadema.18 == 0 -6.598e-01 6.548e-02 -10.076 < 2e-16 *** | |
| O. robusta.24 - O. diadema.18 == 0 -1.081e-01 6.359e-02 -1.700 0.135619 | |
| O. labronica.30 - O. diadema.18 == 0 1.622e-02 6.089e-02 0.266 0.855037 | |
| O. japonica.30 - O. diadema.18 == 0 3.756e-02 6.045e-02 0.621 0.660099 | |
| O. adherens.30 - O. diadema.18 == 0 -2.141e+00 1.078e-01 -19.867 < 2e-16 *** | |
| O. robusta.30 - O. diadema.18 == 0 -1.882e+00 1.345e-01 -13.990 < 2e-16 *** | |
| O. labronica.24 - O. robusta.18 == 0 -3.268e-01 7.339e-02 -4.453 1.81e-05 *** | |
| O. japonica.24 - O. robusta.18 == 0 -1.055e-15 6.718e-02 0.000 1.000000 | |
| O. adherens.24 - O. robusta.18 == 0 -6.973e-01 7.330e-02 -9.513 < 2e-16 *** | |
| O. diadema.24 - O. robusta.18 == 0 -5.289e-02 5.871e-02 -0.901 0.501284 | |
| O. labronica.30 - O. robusta.18 == 0 -2.134e-02 6.923e-02 -0.308 0.834835 | |
| O. japonica.30 - O. robusta.18 == 0 2.165e-15 6.884e-02 0.000 1.000000 | |
| O. adherens.30 - O. robusta.18 == 0 -2.178e+00 1.127e-01 -19.332 < 2e-16 *** | |
| O. diadema.30 - O. robusta.18 == 0 -2.038e+00 1.045e-01 -19.505 < 2e-16 *** | |
| O. japonica.30 - O. labronica.24 == 0 3.268e-01 7.491e-02 4.363 2.59e-05 *** | |
| O. adherens.30 - O. labronica.24 == 0 -1.851e+00 1.165e-01 -15.895 < 2e-16 *** | |
| O. diadema.30 - O. labronica.24 == 0 -1.711e+00 1.086e-01 -15.759 < 2e-16 *** | |
| O. robusta.30 - O. labronica.24 == 0 -1.593e+00 1.416e-01 -11.247 < 2e-16 *** | |
| O. labronica.30 - O. japonica.24 == 0 -2.134e-02 6.923e-02 -0.308 0.834835 | |
| O. adherens.30 - O. japonica.24 == 0 -2.178e+00 1.127e-01 -19.332 < 2e-16 *** | |
| O. diadema.30 - O. japonica.24 == 0 -2.038e+00 1.045e-01 -19.505 < 2e-16 *** | |
| O. robusta.30 - O. japonica.24 == 0 -1.920e+00 1.385e-01 -13.860 < 2e-16 *** | |
| O. labronica.30 - O. adherens.24 == 0 6.760e-01 7.518e-02 8.992 < 2e-16 *** | |
| O. japonica.30 - O. adherens.24 == 0 6.973e-01 7.482e-02 9.320 < 2e-16 *** | |
| O. diadema.30 - O. adherens.24 == 0 -1.341e+00 1.085e-01 -12.354 < 2e-16 *** | |
| O. robusta.30 - O. adherens.24 == 0 -1.222e+00 1.416e-01 -8.633 < 2e-16 *** | |
| O. labronica.30 - O. diadema.24 == 0 3.156e-02 6.104e-02 0.517 0.706020 | |
| O. japonica.30 - O. diadema.24 == 0 5.289e-02 6.060e-02 0.873 0.508720 | |
| O. adherens.30 - O. diadema.24 == 0 -2.125e+00 1.078e-01 -19.709 < 2e-16 *** | |
| O. robusta.30 - O. diadema.24 == 0 -1.867e+00 1.346e-01 -13.869 < 2e-16 *** | |
| O. labronica.30 - O. robusta.24 == 0 1.243e-01 7.354e-02 1.691 0.136357 | |
| O. japonica.30 - O. robusta.24 == 0 1.457e-01 7.317e-02 1.991 0.071830 . | |
| O. adherens.30 - O. robusta.24 == 0 -2.033e+00 1.154e-01 -17.618 < 2e-16 *** | |
| O. diadema.30 - O. robusta.24 == 0 -1.892e+00 1.074e-01 -17.621 < 2e-16 *** |  |
| **b) Total fecundity** | |
| **Estimate SE *t*-value *P-*value** | |
| *Between species within acclimation temperature* | |
| O. japonica.18 - O. labronica.18 == 0 -8.103e+00 5.295e+00 -1.530 0.146896 | |
| O. adherens.18 - O. labronica.18 == 0 5.407e+00 4.718e+00 1.146 0.281239 | |
| O. diadema.18 - O. labronica.18 == 0 -4.198e+00 4.515e+00 -0.930 0.377678 | |
| O. robusta.18 - O. labronica.18 == 0 4.249e+01 5.173e+00 8.213 1.11e-15 *** | |
| O. adherens.18 - O. japonica.18 == 0 1.351e+01 4.718e+00 2.863 0.005790 ** | |
| O. diadema.18 - O. japonica.18 == 0 3.905e+00 4.515e+00 0.865 0.410592 | |
| O. robusta.18 - O. japonica.18 == 0 5.059e+01 5.173e+00 9.779 < 2e-16 *** | |
| O. diadema.18 - O. adherens.18 == 0 -9.605e+00 3.823e+00 -2.512 0.016140 * | |
| O. robusta.18 - O. adherens.18 == 0 3.708e+01 4.581e+00 8.093 3.18e-15 *** | |
| O. robusta.18 - O. diadema.18 == 0 4.668e+01 4.372e+00 10.678 < 2e-16 *** | |
| O. japonica.24 - O. labronica.24 == 0 -1.169e+01 5.048e+00 -2.315 0.026731 * | |
| O. adherens.24 - O. labronica.24 == 0 -1.031e+01 4.637e+00 -2.223 0.033607 * | |
| O. diadema.24 - O. labronica.24 == 0 -2.041e+01 4.372e+00 -4.668 5.90e-06 *** | |
| O. robusta.24 - O. labronica.24 == 0 2.180e+01 5.173e+00 4.215 4.61e-05 *** | |
| O. adherens.24 - O. japonica.24 == 0 1.380e+00 4.637e+00 0.298 0.788592 | |
| O. diadema.24 - O. japonica.24 == 0 -8.724e+00 4.372e+00 -1.995 0.056824 . | |
| O. robusta.24 - O. japonica.24 == 0 3.349e+01 5.173e+00 6.474 2.87e-10 *** | |
| O. diadema.24 - O. adherens.24 == 0 -1.010e+01 3.890e+00 -2.597 0.012813 * | |
| O. robusta.24 - O. adherens.24 == 0 3.211e+01 4.773e+00 6.728 5.49e-11 *** | |
| O. robusta.24 - O. diadema.24 == 0 4.221e+01 4.515e+00 9.348 < 2e-16 *** | |
| O. japonica.30 - O. labronica.30 == 0 -1.299e+01 5.295e+00 -2.454 0.018779 * | |
| O. adherens.30 - O. labronica.30 == 0 -4.022e+01 4.549e+00 -8.842 < 2e-16 *** | |
| O. diadema.30 - O. labronica.30 == 0 -4.078e+01 4.515e+00 -9.031 < 2e-16 *** | |
| O. robusta.30 - O. labronica.30 == 0 -4.078e+01 5.295e+00 -7.702 5.60e-14 *** | |
| O. adherens.30 - O. japonica.30 == 0 -2.723e+01 4.549e+00 -5.986 5.65e-09 *** | |
| O. diadema.30 - O. japonica.30 == 0 -2.779e+01 4.515e+00 -6.154 2.15e-09 *** | |
| O. robusta.30 - O. japonica.30 == 0 -2.779e+01 5.295e+00 -5.248 3.36e-07 *** | |
| O. diadema.30 - O. adherens.30 == 0 -5.579e-01 3.612e+00 -0.154 0.894283 | |
| O. robusta.30 - O. adherens.30 == 0 -5.579e-01 4.549e+00 -0.123 0.911065 | |
| O. robusta.30 - O. diadema.30 == 0 -2.487e-14 4.515e+00 0.000 1.000000 | |
| *Between acclimation temperatures within species* | |
| O. labronica.24 - O. labronica.18 == 0 2.787e+01 5.173e+00 5.387 1.67e-07 *** | |
| O. labronica.30 - O. labronica.18 == 0 2.288e+01 5.295e+00 4.321 2.91e-05 *** | |
| O. labronica.30 - O. labronica.24 == 0 -4.988e+00 5.173e+00 -0.964 0.366359 | |
| O. japonica.24 - O. japonica.18 == 0 2.428e+01 5.173e+00 4.694 5.30e-06 *** | |
| O. japonica.30 - O. japonica.18 == 0 1.799e+01 5.295e+00 3.398 0.001049 ** | |
| O. japonica.30 - O. japonica.24 == 0 -6.295e+00 5.173e+00 -1.217 0.252529 | |
| O. adherens.24 - O. adherens.18 == 0 1.215e+01 4.124e+00 2.947 0.004550 ** | |
| O. adherens.30 - O. adherens.18 == 0 -2.275e+01 3.863e+00 -5.890 9.92e-09 *** | |
| O. adherens.30 - O. adherens.24 == 0 -3.490e+01 3.929e+00 -8.884 < 2e-16 *** | |
| O. diadema.24 - O. diadema.18 == 0 1.166e+01 3.570e+00 3.265 0.001641 ** | |
| O. diadema.30 - O. diadema.18 == 0 -1.370e+01 3.570e+00 -3.838 0.000220 *** | |
| O. diadema.30 - O. diadema.24 == 0 -2.536e+01 3.570e+00 -7.104 4.26e-12 *** | |
| O. robusta.24 - O. robusta.18 == 0 7.183e+00 5.173e+00 1.389 0.190314 | |
| O. robusta.30 - O. robusta.18 == 0 -6.038e+01 5.173e+00 -11.673 < 2e-16 *** | |
| O. robusta.30 - O. robusta.24 == 0 -6.757e+01 5.295e+00 -12.762 < 2e-16 *** | |
| *Among species and acclimation temperatures* | |
| O. japonica.24 - O. labronica.18 == 0 1.618e+01 5.173e+00 3.128 0.002603 ** | |
| O. adherens.24 - O. labronica.18 == 0 1.756e+01 4.773e+00 3.680 0.000389 *** | |
| O. diadema.24 - O. labronica.18 == 0 7.457e+00 4.515e+00 1.652 0.117669 | |
| O. robusta.24 - O. labronica.18 == 0 4.967e+01 5.295e+00 9.381 < 2e-16 *** | |
| O. japonica.30 - O. labronica.18 == 0 9.887e+00 5.295e+00 1.867 0.075533 . | |
| O. adherens.30 - O. labronica.18 == 0 -1.734e+01 4.549e+00 -3.812 0.000241 *** | |
| O. diadema.30 - O. labronica.18 == 0 -1.790e+01 4.515e+00 -3.964 0.000133 *** | |
| O. robusta.30 - O. labronica.18 == 0 -1.790e+01 5.295e+00 -3.381 0.001100 ** | |
| O. labronica.24 - O. japonica.18 == 0 3.597e+01 5.173e+00 6.954 1.21e-11 *** | |
| O. adherens.24 - O. japonica.18 == 0 2.566e+01 4.773e+00 5.377 1.71e-07 *** | |
| O. diadema.24 - O. japonica.18 == 0 1.556e+01 4.515e+00 3.446 0.000905 *** | |
| O. robusta.24 - O. japonica.18 == 0 5.777e+01 5.295e+00 10.911 < 2e-16 *** | |
| O. labronica.30 - O. japonica.18 == 0 3.098e+01 5.295e+00 5.852 1.22e-08 *** | |
| O. adherens.30 - O. japonica.18 == 0 -9.239e+00 4.549e+00 -2.031 0.052814 . | |
| O. diadema.30 - O. japonica.18 == 0 -9.797e+00 4.515e+00 -2.170 0.037994 * | |
| O. robusta.30 - O. japonica.18 == 0 -9.797e+00 5.295e+00 -1.850 0.077571 . | |
| O. labronica.24 - O. adherens.18 == 0 2.246e+01 4.581e+00 4.903 1.91e-06 *** | |
| O. japonica.24 - O. adherens.18 == 0 1.077e+01 4.581e+00 2.352 0.024526 * | |
| O. diadema.24 - O. adherens.18 == 0 2.050e+00 3.823e+00 0.536 0.615233 | |
| O. robusta.24 - O. adherens.18 == 0 4.426e+01 4.718e+00 9.381 < 2e-16 *** | |
| O. labronica.30 - O. adherens.18 == 0 1.747e+01 4.718e+00 3.703 0.000361 *** | |
| O. japonica.30 - O. adherens.18 == 0 4.479e+00 4.718e+00 0.949 0.370693 | |
| O. diadema.30 - O. adherens.18 == 0 -2.331e+01 3.823e+00 -6.096 3.00e-09 *** | |
| O. robusta.30 - O. adherens.18 == 0 -2.331e+01 4.718e+00 -4.940 1.61e-06 *** | |
| O. labronica.24 - O. diadema.18 == 0 3.207e+01 4.372e+00 7.334 8.06e-13 *** | |
| O. japonica.24 - O. diadema.18 == 0 2.038e+01 4.372e+00 4.661 6.00e-06 *** | |
| O. adherens.24 - O. diadema.18 == 0 2.176e+01 3.890e+00 5.594 5.31e-08 *** | |
| O. robusta.24 - O. diadema.18 == 0 5.387e+01 4.515e+00 11.930 < 2e-16 *** | |
| O. labronica.30 - O. diadema.18 == 0 2.708e+01 4.515e+00 5.997 5.42e-09 *** | |
| O. japonica.30 - O. diadema.18 == 0 1.408e+01 4.515e+00 3.119 0.002644 ** | |
| O. adherens.30 - O. diadema.18 == 0 -1.314e+01 3.612e+00 -3.639 0.000449 *** | |
| O. robusta.30 - O. diadema.18 == 0 -1.370e+01 4.515e+00 -3.034 0.003466 ** | |
| O. labronica.24 - O. robusta.18 == 0 -1.462e+01 5.048e+00 -2.896 0.005297 ** | |
| O. japonica.24 - O. robusta.18 == 0 -2.630e+01 5.048e+00 -5.210 4.04e-07 *** | |
| O. adherens.24 - O. robusta.18 == 0 -2.492e+01 4.637e+00 -5.375 1.71e-07 *** | |
| O. diadema.24 - O. robusta.18 == 0 -3.503e+01 4.372e+00 -8.012 5.07e-15 *** | |
| O. labronica.30 - O. robusta.18 == 0 -1.961e+01 5.173e+00 -3.790 0.000259 *** | |
| O. japonica.30 - O. robusta.18 == 0 -3.260e+01 5.173e+00 -6.302 8.58e-10 *** | |
| O. adherens.30 - O. robusta.18 == 0 -5.983e+01 4.406e+00 -13.577 < 2e-16 *** | |
| O. diadema.30 - O. robusta.18 == 0 -6.038e+01 4.372e+00 -13.812 < 2e-16 *** | |
| O. japonica.30 - O. labronica.24 == 0 -1.798e+01 5.173e+00 -3.476 0.000822 *** | |
| O. adherens.30 - O. labronica.24 == 0 -4.521e+01 4.406e+00 -10.260 < 2e-16 *** | |
| O. diadema.30 - O. labronica.24 == 0 -4.577e+01 4.372e+00 -10.468 < 2e-16 *** | |
| O. robusta.30 - O. labronica.24 == 0 -4.577e+01 5.173e+00 -8.847 < 2e-16 *** | |
| O. labronica.30 - O. japonica.24 == 0 6.698e+00 5.173e+00 1.295 0.222965 | |
| O. adherens.30 - O. japonica.24 == 0 -3.352e+01 4.406e+00 -7.608 1.13e-13 *** | |
| O. diadema.30 - O. japonica.24 == 0 -3.408e+01 4.372e+00 -7.795 2.82e-14 *** | |
| O. robusta.30 - O. japonica.24 == 0 -3.408e+01 5.173e+00 -6.588 1.37e-10 *** | |
| O. labronica.30 - O. adherens.24 == 0 5.319e+00 4.773e+00 1.114 0.293001 | |
| O. japonica.30 - O. adherens.24 == 0 -7.674e+00 4.773e+00 -1.608 0.127220 | |
| O. diadema.30 - O. adherens.24 == 0 -3.546e+01 3.890e+00 -9.116 < 2e-16 *** | |
| O. robusta.30 - O. adherens.24 == 0 -3.546e+01 4.773e+00 -7.430 4.07e-13 *** | |
| O. labronica.30 - O. diadema.24 == 0 1.542e+01 4.515e+00 3.416 0.000998 *** | |
| O. japonica.30 - O. diadema.24 == 0 2.429e+00 4.515e+00 0.538 0.615233 | |
| O. adherens.30 - O. diadema.24 == 0 -2.480e+01 3.612e+00 -6.866 2.17e-11 *** | |
| O. robusta.30 - O. diadema.24 == 0 -2.536e+01 4.515e+00 -5.616 4.78e-08 *** | |
| O. labronica.30 - O. robusta.24 == 0 -2.679e+01 5.295e+00 -5.060 8.82e-07 *** | |
| O. japonica.30 - O. robusta.24 == 0 -3.978e+01 5.295e+00 -7.514 2.24e-13 *** | |
| O. adherens.30 - O. robusta.24 == 0 -6.701e+01 4.549e+00 -14.731 < 2e-16 *** | |
| O. diadema.30 - O. robusta.24 == 0 -6.757e+01 4.515e+00 -14.964 < 2e-16 *** | |

**Table S11**. Relationship between the physiological acclimation ability and geographic range size of the studied species of the genus *Ophryotrocha* for all endpoints used as proxy of upper (a-c) and lower (d-e) physiological thermal tolerance limits (CTmax and CTmin, respectively). Species physiological acclimation ability was measured as difference between CTmin or CTmax measured at 24 and 18 °C (ΔCTmin and ΔCTmax, respectively). Range size was measured as extent of occurrence (EOO; see main manuscript and Online Resources 2, Table S2)

|  | **Species** | **Mean body size (number of chaetigers)** | **Acclimation capacity** |  | ***t*-value** | ***P-*value** |
| --- | --- | --- | --- | --- | --- | --- |
| **CTmax** |  |  | **ΔCTmax** |  |  |  |
| **a) Loss of locomotion** | *O. labronica* | 13.01 | 1.51 | Intercept | 0.95 | 0.40 |
| **control** | *O. japonica* | 15.65 | 3.30 | Body size | -0.47 | 0.66 |
| **(°C)** | *O. adherens* | 11.55 | 5.26 | EOO | -0.57 | 0.60 |
|  | *O. puerilis* | 23.60 | 3.18 |  |  |  |
|  | *O. hartmanni* | 21.63 | 3.19 |  |  |  |
|  | *O. diadema* | 14.82 | 2.10 |  |  |  |
|  | *O. robusta* | 15.60 | 2.84 |  |  |  |
| **b) Onset of spasms** | *O. labronica* | 13.02 | 0.83 | Intercept | -0.57 | 0.60 |
| **(°C)** | *O. japonica* | 15.65 | 0.91 | Body size | 1.70 | 0.16 |
|  | *O. adherens* | 11.55 | 0.01 | EOO | -0.74 | 0.50 |
|  | *O. puerilis* | 23.60 | 1.94 |  |  |  |
|  | *O. hartmanni* | 21.63 | 0.99 |  |  |  |
|  | *O. diadema* | 14.80 | 0.92 |  |  |  |
|  | *O. robusta* | 15.60 | 2.21 |  |  |  |
| **c) Lethal** | *O. labronica* | 13.02 | 0.55 | Intercept | 0.47 | 0.66 |
| **temperature** | *O. japonica* | 15.65 | 0.65 | Body size | 0.31 | 0.77 |
| **(°C)** | *O. adherens* | 11.55 | 0.36 | EOO | 0.43 | 0.69 |
|  | *O. puerilis* | 23.60 | 0.49 |  |  |  |
|  | *O. hartmanni* | 21.65 | 0.42 |  |  |  |
|  | *O. diadema* | 14.80 | 0.73 |  |  |  |
|  | *O. robusta* | 15.60 | 0.24 |  |  |  |
| **CTmin** |  |  | **ΔCTmin** |  |  |  |
| **d) Onset of spasms** | *O. labronica* | 13.48 | 1.23 | Intercept | 1.08 | 0.33 |
| **(°C)** | *O. japonica* | 15.78 | 3.32 | Body size | -0.65 | 0.55 |
|  | *O. adherens* | 11.80 | 4.20 | EOO | -0.55 | 0.61 |
|  | *O. puerilis* | 22.65 | 2.02 |  |  |  |
|  | *O. hartmanni* | 22.30 | 3.36 |  |  |  |
|  | *O. diadema* | 14.65 | 2.44 |  |  |  |
|  | *O. robusta* | 15.35 | 1.69 |  |  |  |
| **e) Chill coma** | *O. labronica* | 13.48 | 0.16 | Intercept | 1.88 | 0.13 |
| **(°C)** | *O. japonica* | 15.78 | 0.6 | Body size | -1.31 | 0.26 |
|  | *O. adherens* | 11.80 | 2.68 | EOO | -0.91 | 0.41 |
|  | *O. puerilis* | 22.65 | 0.78 |  |  |  |
|  | *O. hartmanni* | 22.30 | 4.39 |  |  |  |
|  | *O. diadema* | 14.65 | 1.34 |  |  |  |
|  | *O. robusta* | 15.35 | 0.82 |  |  |  |

**Table S12**. Niche breadth–range size relationship tested for the four performance ranges –for *critical tolerance*, *tolerance*, *growth* and *reproduction* – used to build the curves of the fundamental thermal niche of the studied species of the genus *Ophryotrocha* and quantified as habitat suitability index (HSI). Niche breadth was calculated as difference between the upper and lower limits delimiting each performance range. Range size was measured as extent of occurrence (EOO; see main manuscript and Online Resources 2, Table S2)

| **Performance range** | **HSI** | **Species** | **CTmin (°C)** | **CTmax (°C)** | **Niche breadth**  **(CTmax - CTmin)** |  | ***t*-value** | ***P-*value** |
| --- | --- | --- | --- | --- | --- | --- | --- | --- |
| **a) *Critical*** | **0.1** | *O. labronica* | -0.60 | 38.00 | 38.60 | Intercept | 7.62 | 0.001 |
| ***tolerance*** |  | *O. japonica* | -2.00 | 38.00 | 40.00 | EOO | -0.20 | 0.85 |
|  |  | *O. puerilis* | -2.80 | 33.80 | 36.60 |  |  |  |
|  |  | *O. hartmanni* | 1.90 | 33.80 | 31.90 |  |  |  |
|  |  | *O. robusta* | -1.40 | 36.50 | 37.90 |  |  |  |
|  |  | *O. adherens* | 2.70 | 37.30 | 34.60 |  |  |  |
|  |  | *O. diadema* | -1.30 | 38.00 | 39.30 |  |  |  |
| **b) *Tolerance*** | **0.3** | *O. labronica* | 6.10 | 35.60 | 29.50 | Intercept | 6.92 | 0.01 |
|  |  | *O. japonica* | 5.50 | 35.60 | 30.10 | EOO | 0.75 | 0.48 |
|  |  | *O. puerilis* | 4.70 | 30.80 | 26.10 |  |  |  |
|  |  | *O. hartmanni* | 6.70 | 29.60 | 22.90 |  |  |  |
|  |  | *O. robusta* | 5.90 | 32.80 | 26.90 |  |  |  |
|  |  | *O. adherens* | 6.70 | 32.00 | 25.30 |  |  |  |
|  |  | *O. diadema* | 5.10 | 33.40 | 28.30 |  |  |  |
| **c) *Growth*** | **0.5** | *O. labronica* | 7.40 | 34.10 | 26.70 | Intercept | 3.37 | 0.06 |
|  |  | *O. japonica* | 8.80 | 32.30 | 23.50 | EOO | 0.61 | 0.57 |
|  |  | *O. puerilis* | 6.80 | 27.80 | 21.00 |  |  |  |
|  |  | *O. hartmanni* | 10.00 | 26.40 | 16.40 |  |  |  |
|  |  | *O. robusta* | 7.60 | 30.00 | 22.40 |  |  |  |
|  |  | *O. adherens* | 10.90 | 26.80 | 15.90 |  |  |  |
|  |  | *O. diadema* | 7.50 | 31.30 | 23.80 |  |  |  |
| **d) *Reproduction*** | **0.8** | *O. labronica* | 16.00 | 34.00 | 18.00 | Intercept | 1.83 | 0.13 |
|  |  | *O. japonica* | 17.00 | 32.00 | 15.00 | EOO | 0.66 | 0.54 |
|  |  | *O. puerilis* | 17.00 | 26.00 | 9.00 |  |  |  |
|  |  | *O. hartmanni* | 15.00 | 25.50 | 10.50 |  |  |  |
|  |  | *O. robusta* | 12.50 | 30.00 | 17.50 |  |  |  |
|  |  | *O. adherens* | 15.00 | 26.50 | 11.50 |  |  |  |
|  |  | *O. diadema* | 16.00 | 30.00 | 14.00 |  |  |  |
